# Supplementary material for: The roles of history, chance, and natural selection in the evolution of antibiotic resistance
Source: eLife. 2021 Aug 25;10:e70676. doi: 10.7554/eLife.70676 (PMC8412936; doi:10.7554/eLife.70676)
Supplement: Figure 1—source data 2. [file elife-70676-fig1-data2.csv]

Drug_evolved	Drug_tested	Day	Ancestor	Population	Measurement	MIC			Figure 1-source data 1. MIC levels for all ancestral clones and evolved clones by treatment.
Ceftazidime	Ceftazidime	0	B1	0	1	4
Ceftazidime	Ceftazidime	0	B1	0	2	4
Ceftazidime	Ceftazidime	0	B1	0	3	8
Ceftazidime	Ceftazidime	0	B2	0	1	2
Ceftazidime	Ceftazidime	0	B2	0	2	2
Ceftazidime	Ceftazidime	0	B2	0	3	4
Ceftazidime	Ceftazidime	0	B3	0	1	4
Ceftazidime	Ceftazidime	0	B3	0	2	4
Ceftazidime	Ceftazidime	0	B3	0	3	4
Ceftazidime	Ceftazidime	0	P1	0	1	16
Ceftazidime	Ceftazidime	0	P1	0	2	16
Ceftazidime	Ceftazidime	0	P1	0	3	16
Ceftazidime	Ceftazidime	0	P2	0	1	8
Ceftazidime	Ceftazidime	0	P2	0	2	16
Ceftazidime	Ceftazidime	0	P2	0	3	8
Ceftazidime	Ceftazidime	0	P3	0	1	4
Ceftazidime	Ceftazidime	0	P3	0	2	2
Ceftazidime	Ceftazidime	0	P3	0	3	8
Ceftazidime	Ceftazidime	3	B1	1	1	21.14342482
Ceftazidime	Ceftazidime	3	B1	2	1	21.14342482
Ceftazidime	Ceftazidime	3	B1	3	1	21.14342482
Ceftazidime	Ceftazidime	3	B2	1	1	2.642928103
Ceftazidime	Ceftazidime	3	B2	2	1	5.285856205
Ceftazidime	Ceftazidime	3	B2	3	1	10.57171241
Ceftazidime	Ceftazidime	3	B3	1	1	21.14342482
Ceftazidime	Ceftazidime	3	B3	2	1	21.14342482
Ceftazidime	Ceftazidime	3	B3	3	1	42.28684964
Ceftazidime	Ceftazidime	3	P1	1	1	84.57369928
Ceftazidime	Ceftazidime	3	P1	2	1	84.57369928
Ceftazidime	Ceftazidime	3	P1	3	1	84.57369928
Ceftazidime	Ceftazidime	3	P2	1	1	10.57171241
Ceftazidime	Ceftazidime	3	P2	2	1	5.285856205
Ceftazidime	Ceftazidime	3	P2	3	1	5.285856205
Ceftazidime	Ceftazidime	3	P3	1	1	5.285856205
Ceftazidime	Ceftazidime	3	P3	2	1	2.642928103
Ceftazidime	Ceftazidime	3	P3	3	1	2.642928103
Ceftazidime	Ceftazidime	3	B1	1	2	21.14342482
Ceftazidime	Ceftazidime	3	B1	2	2	21.14342482
Ceftazidime	Ceftazidime	3	B1	3	2	21.14342482
Ceftazidime	Ceftazidime	3	B2	1	2	2.642928103
Ceftazidime	Ceftazidime	3	B2	2	2	5.285856205
Ceftazidime	Ceftazidime	3	B2	3	2	5.285856205
Ceftazidime	Ceftazidime	3	B3	1	2	21.14342482
Ceftazidime	Ceftazidime	3	B3	2	2	42.28684964
Ceftazidime	Ceftazidime	3	B3	3	2	42.28684964
Ceftazidime	Ceftazidime	3	P1	1	2	84.57369928
Ceftazidime	Ceftazidime	3	P1	2	2	84.57369928
Ceftazidime	Ceftazidime	3	P1	3	2	84.57369928
Ceftazidime	Ceftazidime	3	P2	1	2	10.57171241
Ceftazidime	Ceftazidime	3	P2	2	2	5.285856205
Ceftazidime	Ceftazidime	3	P2	3	2	10.57171241
Ceftazidime	Ceftazidime	3	P3	1	2	2.642928103
Ceftazidime	Ceftazidime	3	P3	2	2	2.642928103
Ceftazidime	Ceftazidime	3	P3	3	2	5.285856205
Ceftazidime	Ceftazidime	3	B1	1	3	21.14342482
Ceftazidime	Ceftazidime	3	B1	2	3	21.14342482
Ceftazidime	Ceftazidime	3	B1	3	3	21.14342482
Ceftazidime	Ceftazidime	3	B2	1	3	5.285856205
Ceftazidime	Ceftazidime	3	B2	2	3	0
Ceftazidime	Ceftazidime	3	B2	3	3	5.285856205
Ceftazidime	Ceftazidime	3	B3	1	3	21.14342482
Ceftazidime	Ceftazidime	3	B3	2	3	42.28684964
Ceftazidime	Ceftazidime	3	B3	3	3	42.28684964
Ceftazidime	Ceftazidime	3	P1	1	3	84.57369928
Ceftazidime	Ceftazidime	3	P1	2	3	84.57369928
Ceftazidime	Ceftazidime	3	P1	3	3	84.57369928
Ceftazidime	Ceftazidime	3	P2	1	3	5.285856205
Ceftazidime	Ceftazidime	3	P2	2	3	5.285856205
Ceftazidime	Ceftazidime	3	P2	3	3	5.285856205
Ceftazidime	Ceftazidime	3	P3	1	3	2.642928103
Ceftazidime	Ceftazidime	3	P3	2	3	2.642928103
Ceftazidime	Ceftazidime	3	P3	3	3	5.285856205
Ceftazidime	Ceftazidime	12	B1	1	1	42.4
Ceftazidime	Ceftazidime	12	B1	2	1	42.4
Ceftazidime	Ceftazidime	12	B1	3	1	42.4
Ceftazidime	Ceftazidime	12	B2	1	1	42.4
Ceftazidime	Ceftazidime	12	B2	2	1	21.2
Ceftazidime	Ceftazidime	12	B2	3	1	42.4
Ceftazidime	Ceftazidime	12	B3	1	1	42.4
Ceftazidime	Ceftazidime	12	B3	2	1	21.2
Ceftazidime	Ceftazidime	12	B3	3	1	42.4
Ceftazidime	Ceftazidime	12	P1	1	1	84.8
Ceftazidime	Ceftazidime	12	P1	2	1	169.6
Ceftazidime	Ceftazidime	12	P1	3	1	169.6
Ceftazidime	Ceftazidime	12	P2	1	1	84.8
Ceftazidime	Ceftazidime	12	P2	2	1	42.4
Ceftazidime	Ceftazidime	12	P2	3	1	42.4
Ceftazidime	Ceftazidime	12	P3	1	1	84.8
Ceftazidime	Ceftazidime	12	P3	2	1	84.8
Ceftazidime	Ceftazidime	12	P3	3	1	84.8
Ceftazidime	Ceftazidime	12	B1	1	2	42.4
Ceftazidime	Ceftazidime	12	B1	2	2	42.4
Ceftazidime	Ceftazidime	12	B1	3	2	42.4
Ceftazidime	Ceftazidime	12	B2	1	2	42.4
Ceftazidime	Ceftazidime	12	B2	2	2	42.4
Ceftazidime	Ceftazidime	12	B2	3	2	42.4
Ceftazidime	Ceftazidime	12	B3	1	2	42.4
Ceftazidime	Ceftazidime	12	B3	2	2	21.2
Ceftazidime	Ceftazidime	12	B3	3	2	42.4
Ceftazidime	Ceftazidime	12	P1	1	2	84.8
Ceftazidime	Ceftazidime	12	P1	2	2	169.6
Ceftazidime	Ceftazidime	12	P1	3	2	84.8
Ceftazidime	Ceftazidime	12	P2	1	2	84.8
Ceftazidime	Ceftazidime	12	P2	2	2	42.4
Ceftazidime	Ceftazidime	12	P2	3	2	42.4
Ceftazidime	Ceftazidime	12	P3	1	2	42.4
Ceftazidime	Ceftazidime	12	P3	2	2	84.8
Ceftazidime	Ceftazidime	12	P3	3	2	42.4
Ceftazidime	Ceftazidime	12	B1	1	3	42.4
Ceftazidime	Ceftazidime	12	B1	2	3	42.4
Ceftazidime	Ceftazidime	12	B1	3	3	84.8
Ceftazidime	Ceftazidime	12	B2	1	3	42.4
Ceftazidime	Ceftazidime	12	B2	2	3	42.4
Ceftazidime	Ceftazidime	12	B2	3	3	42.4
Ceftazidime	Ceftazidime	12	B3	1	3	42.4
Ceftazidime	Ceftazidime	12	B3	2	3	21.2
Ceftazidime	Ceftazidime	12	B3	3	3	42.4
Ceftazidime	Ceftazidime	12	P1	1	3	42.4
Ceftazidime	Ceftazidime	12	P1	2	3	169.6
Ceftazidime	Ceftazidime	12	P1	3	3	84.8
Ceftazidime	Ceftazidime	12	P2	1	3	84.8
Ceftazidime	Ceftazidime	12	P2	2	3	84.8
Ceftazidime	Ceftazidime	12	P2	3	3	42.4
Ceftazidime	Ceftazidime	12	P3	1	3	42.4
Ceftazidime	Ceftazidime	12	P3	2	3	42.4
Ceftazidime	Ceftazidime	12	P3	3	3	2.65
Ceftazidime	Ciprofloxacin	0	B1	0	1	0.5
Ceftazidime	Ciprofloxacin	0	B1	0	2	0.25
Ceftazidime	Ciprofloxacin	0	B1	0	3	0.25
Ceftazidime	Ciprofloxacin	0	B2	0	1	1
Ceftazidime	Ciprofloxacin	0	B2	0	2	1
Ceftazidime	Ciprofloxacin	0	B2	0	3	1
Ceftazidime	Ciprofloxacin	0	B3	0	1	0.5
Ceftazidime	Ciprofloxacin	0	B3	0	2	0.5
Ceftazidime	Ciprofloxacin	0	B3	0	3	0.5
Ceftazidime	Ciprofloxacin	0	P1	0	1	8
Ceftazidime	Ciprofloxacin	0	P1	0	2	16
Ceftazidime	Ciprofloxacin	0	P1	0	3	8
Ceftazidime	Ciprofloxacin	0	P2	0	1	4
Ceftazidime	Ciprofloxacin	0	P2	0	2	4
Ceftazidime	Ciprofloxacin	0	P2	0	3	8
Ceftazidime	Ciprofloxacin	0	P3	0	1	16
Ceftazidime	Ciprofloxacin	0	P3	0	2	16
Ceftazidime	Ciprofloxacin	0	P3	0	3	8
Ceftazidime	Ciprofloxacin	12	B1	1	1	0.5
Ceftazidime	Ciprofloxacin	12	B1	2	1	0.13
Ceftazidime	Ciprofloxacin	12	B1	3	1	1
Ceftazidime	Ciprofloxacin	12	B2	1	1	0.06
Ceftazidime	Ciprofloxacin	12	B2	2	1	0.13
Ceftazidime	Ciprofloxacin	12	B2	3	1	0.13
Ceftazidime	Ciprofloxacin	12	B3	1	1	0.13
Ceftazidime	Ciprofloxacin	12	B3	2	1	0.5
Ceftazidime	Ciprofloxacin	12	B3	3	1	0.13
Ceftazidime	Ciprofloxacin	12	P1	1	1	16.03
Ceftazidime	Ciprofloxacin	12	P1	2	1	16.03
Ceftazidime	Ciprofloxacin	12	P1	3	1	8.02
Ceftazidime	Ciprofloxacin	12	P2	1	1	8.02
Ceftazidime	Ciprofloxacin	12	P2	2	1	0.5
Ceftazidime	Ciprofloxacin	12	P2	3	1	8.02
Ceftazidime	Ciprofloxacin	12	P3	1	1	8.02
Ceftazidime	Ciprofloxacin	12	P3	2	1	8.02
Ceftazidime	Ciprofloxacin	12	P3	3	1	8.02
Ceftazidime	Ciprofloxacin	12	B1	1	2	0.5
Ceftazidime	Ciprofloxacin	12	B1	2	2	0.13
Ceftazidime	Ciprofloxacin	12	B1	3	2	1
Ceftazidime	Ciprofloxacin	12	B2	1	2	0.06
Ceftazidime	Ciprofloxacin	12	B2	2	2	0.13
Ceftazidime	Ciprofloxacin	12	B2	3	2	0.13
Ceftazidime	Ciprofloxacin	12	B3	1	2	0.13
Ceftazidime	Ciprofloxacin	12	B3	2	2	0.5
Ceftazidime	Ciprofloxacin	12	B3	3	2	0.13
Ceftazidime	Ciprofloxacin	12	P1	1	2	16.03
Ceftazidime	Ciprofloxacin	12	P1	2	2	16.03
Ceftazidime	Ciprofloxacin	12	P1	3	2	8.02
Ceftazidime	Ciprofloxacin	12	P2	1	2	8.02
Ceftazidime	Ciprofloxacin	12	P2	2	2	0.5
Ceftazidime	Ciprofloxacin	12	P2	3	2	8.02
Ceftazidime	Ciprofloxacin	12	P3	1	2	8.02
Ceftazidime	Ciprofloxacin	12	P3	2	2	8.02
Ceftazidime	Ciprofloxacin	12	P3	3	2	8.02
Ceftazidime	Ciprofloxacin	12	B1	1	3	0.5
Ceftazidime	Ciprofloxacin	12	B1	2	3	0.13
Ceftazidime	Ciprofloxacin	12	B1	3	3	1
Ceftazidime	Ciprofloxacin	12	B2	1	3	0.06
Ceftazidime	Ciprofloxacin	12	B2	2	3	0.13
Ceftazidime	Ciprofloxacin	12	B2	3	3	0.13
Ceftazidime	Ciprofloxacin	12	B3	1	3	0.13
Ceftazidime	Ciprofloxacin	12	B3	2	3	0.5
Ceftazidime	Ciprofloxacin	12	B3	3	3	0.13
Ceftazidime	Ciprofloxacin	12	P1	1	3	16.03
Ceftazidime	Ciprofloxacin	12	P1	2	3	16.03
Ceftazidime	Ciprofloxacin	12	P1	3	3	8.02
Ceftazidime	Ciprofloxacin	12	P2	1	3	8.02
Ceftazidime	Ciprofloxacin	12	P2	2	3	0.5
Ceftazidime	Ciprofloxacin	12	P2	3	3	8.02
Ceftazidime	Ciprofloxacin	12	P3	1	3	8.02
Ceftazidime	Ciprofloxacin	12	P3	2	3	8.02
Ceftazidime	Ciprofloxacin	12	P3	3	3	8.02
Ceftazidime	Imipenem	0	B1	0	1	0.06
Ceftazidime	Imipenem	0	B1	0	2	0.06
Ceftazidime	Imipenem	0	B1	0	3	0.06
Ceftazidime	Imipenem	0	B2	0	1	0.13
Ceftazidime	Imipenem	0	B2	0	2	0.13
Ceftazidime	Imipenem	0	B2	0	3	0.06
Ceftazidime	Imipenem	0	B3	0	1	0.06
Ceftazidime	Imipenem	0	B3	0	2	0.06
Ceftazidime	Imipenem	0	B3	0	3	0.06
Ceftazidime	Imipenem	0	P1	0	1	0.03
Ceftazidime	Imipenem	0	P1	0	2	0.06
Ceftazidime	Imipenem	0	P1	0	3	0.06
Ceftazidime	Imipenem	0	P2	0	1	0.06
Ceftazidime	Imipenem	0	P2	0	2	0.06
Ceftazidime	Imipenem	0	P2	0	3	0.06
Ceftazidime	Imipenem	0	P3	0	1	0.06
Ceftazidime	Imipenem	0	P3	0	2	0.06
Ceftazidime	Imipenem	0	P3	0	3	0.03
Ceftazidime	Imipenem	12	B1	1	1	0.33
Ceftazidime	Imipenem	12	B1	2	1	0.08
Ceftazidime	Imipenem	12	B1	3	1	0.17
Ceftazidime	Imipenem	12	B2	1	1	0.17
Ceftazidime	Imipenem	12	B2	2	1	0.17
Ceftazidime	Imipenem	12	B2	3	1	0.17
Ceftazidime	Imipenem	12	B3	1	1	0.17
Ceftazidime	Imipenem	12	B3	2	1	0.17
Ceftazidime	Imipenem	12	B3	3	1	0.33
Ceftazidime	Imipenem	12	P1	1	1	0.17
Ceftazidime	Imipenem	12	P1	2	1	0.33
Ceftazidime	Imipenem	12	P1	3	1	0.17
Ceftazidime	Imipenem	12	P2	1	1	0.08
Ceftazidime	Imipenem	12	P2	2	1	0.08
Ceftazidime	Imipenem	12	P2	3	1	0.17
Ceftazidime	Imipenem	12	P3	1	1	0.08
Ceftazidime	Imipenem	12	P3	2	1	0.17
Ceftazidime	Imipenem	12	P3	3	1	0.08
Ceftazidime	Imipenem	12	B1	1	2	0.33
Ceftazidime	Imipenem	12	B1	2	2	0.17
Ceftazidime	Imipenem	12	B1	3	2	0.17
Ceftazidime	Imipenem	12	B2	1	2	0.17
Ceftazidime	Imipenem	12	B2	2	2	0.17
Ceftazidime	Imipenem	12	B2	3	2	0.33
Ceftazidime	Imipenem	12	B3	1	2	0.17
Ceftazidime	Imipenem	12	B3	2	2	0.17
Ceftazidime	Imipenem	12	B3	3	2	0.33
Ceftazidime	Imipenem	12	P1	1	2	0.17
Ceftazidime	Imipenem	12	P1	2	2	0.33
Ceftazidime	Imipenem	12	P1	3	2	0.17
Ceftazidime	Imipenem	12	P2	1	2	0.08
Ceftazidime	Imipenem	12	P2	2	2	0.08
Ceftazidime	Imipenem	12	P2	3	2	0.17
Ceftazidime	Imipenem	12	P3	1	2	0.08
Ceftazidime	Imipenem	12	P3	2	2	0.17
Ceftazidime	Imipenem	12	P3	3	2	0.08
Ceftazidime	Imipenem	12	B1	1	3	0.33
Ceftazidime	Imipenem	12	B1	2	3	0.17
Ceftazidime	Imipenem	12	B1	3	3	0.17
Ceftazidime	Imipenem	12	B2	1	3	0.17
Ceftazidime	Imipenem	12	B2	2	3	0.08
Ceftazidime	Imipenem	12	B2	3	3	0.33
Ceftazidime	Imipenem	12	B3	1	3	0.08
Ceftazidime	Imipenem	12	B3	2	3	0.17
Ceftazidime	Imipenem	12	B3	3	3	0.33
Ceftazidime	Imipenem	12	P1	1	3	0.17
Ceftazidime	Imipenem	12	P1	2	3	0.33
Ceftazidime	Imipenem	12	P1	3	3	0.17
Ceftazidime	Imipenem	12	P2	1	3	0.08
Ceftazidime	Imipenem	12	P2	2	3	0.08
Ceftazidime	Imipenem	12	P2	3	3	0.17
Ceftazidime	Imipenem	12	P3	1	3	0.08
Ceftazidime	Imipenem	12	P3	2	3	0.17
Ceftazidime	Imipenem	12	P3	3	3	0.08
Imipenem	Imipenem	0	B1	0	1	0.0625
Imipenem	Imipenem	0	B1	0	2	0.0625
Imipenem	Imipenem	0	B1	0	3	0.0625
Imipenem	Imipenem	0	B2	0	1	0.13
Imipenem	Imipenem	0	B2	0	2	0.13
Imipenem	Imipenem	0	B2	0	3	0.06
Imipenem	Imipenem	0	B3	0	1	0.06
Imipenem	Imipenem	0	B3	0	2	0.06
Imipenem	Imipenem	0	B3	0	3	0.06
Imipenem	Imipenem	0	P1	0	1	0.03
Imipenem	Imipenem	0	P1	0	2	0.06
Imipenem	Imipenem	0	P1	0	3	0.06
Imipenem	Imipenem	0	P2	0	1	0.06
Imipenem	Imipenem	0	P2	0	2	0.06
Imipenem	Imipenem	0	P2	0	3	0.06
Imipenem	Imipenem	0	P3	0	1	0.06
Imipenem	Imipenem	0	P3	0	2	0.06
Imipenem	Imipenem	0	P3	0	3	0.03
Imipenem	Imipenem	3	B1	1	1	0.17
Imipenem	Imipenem	3	B1	2	1	0.17
Imipenem	Imipenem	3	B1	3	1	0.17
Imipenem	Imipenem	3	B2	1	1	0.17
Imipenem	Imipenem	3	B2	2	1	0.17
Imipenem	Imipenem	3	B2	3	1	0.17
Imipenem	Imipenem	3	B3	1	1	0.17
Imipenem	Imipenem	3	B3	2	1	0.08
Imipenem	Imipenem	3	B3	3	1	0.17
Imipenem	Imipenem	3	P1	1	1	0.33
Imipenem	Imipenem	3	P1	2	1	0.17
Imipenem	Imipenem	3	P1	3	1	0.17
Imipenem	Imipenem	3	P2	1	1	0.17
Imipenem	Imipenem	3	P2	2	1	0.17
Imipenem	Imipenem	3	P2	3	1	0.17
Imipenem	Imipenem	3	P3	1	1	0.17
Imipenem	Imipenem	3	P3	2	1	0.17
Imipenem	Imipenem	3	P3	3	1	0.17
Imipenem	Imipenem	3	B1	1	2	0.17
Imipenem	Imipenem	3	B1	2	2	0.17
Imipenem	Imipenem	3	B1	3	2	0.08
Imipenem	Imipenem	3	B2	1	2	0.17
Imipenem	Imipenem	3	B2	2	2	0.17
Imipenem	Imipenem	3	B2	3	2	0.17
Imipenem	Imipenem	3	B3	1	2	0.17
Imipenem	Imipenem	3	B3	2	2	0.08
Imipenem	Imipenem	3	B3	3	2	0.17
Imipenem	Imipenem	3	P1	1	2	0.33
Imipenem	Imipenem	3	P1	2	2	0.17
Imipenem	Imipenem	3	P1	3	2	0.17
Imipenem	Imipenem	3	P2	1	2	0.17
Imipenem	Imipenem	3	P2	2	2	0.17
Imipenem	Imipenem	3	P2	3	2	0.17
Imipenem	Imipenem	3	P3	1	2	0.17
Imipenem	Imipenem	3	P3	2	2	0.17
Imipenem	Imipenem	3	P3	3	2	0.17
Imipenem	Imipenem	3	B1	1	3	0.17
Imipenem	Imipenem	3	B1	2	3	0.08
Imipenem	Imipenem	3	B1	3	3	0.17
Imipenem	Imipenem	3	B2	1	3	0.17
Imipenem	Imipenem	3	B2	2	3	0.33
Imipenem	Imipenem	3	B2	3	3	0.17
Imipenem	Imipenem	3	B3	1	3	0.17
Imipenem	Imipenem	3	B3	2	3	0.08
Imipenem	Imipenem	3	B3	3	3	0.17
Imipenem	Imipenem	3	P1	1	3	0.33
Imipenem	Imipenem	3	P1	2	3	0.17
Imipenem	Imipenem	3	P1	3	3	0.17
Imipenem	Imipenem	3	P2	1	3	0.17
Imipenem	Imipenem	3	P2	2	3	0.17
Imipenem	Imipenem	3	P2	3	3	0.17
Imipenem	Imipenem	3	P3	1	3	0.17
Imipenem	Imipenem	3	P3	2	3	0.17
Imipenem	Imipenem	3	P3	3	3	0.17
Imipenem	Imipenem	12	B1	1	1	0.332
Imipenem	Imipenem	12	B1	2	1	0.33
Imipenem	Imipenem	12	B1	3	1	0.33
Imipenem	Imipenem	12	B2	1	1	0.33
Imipenem	Imipenem	12	B2	2	1	0.33
Imipenem	Imipenem	12	B2	3	1	0.33
Imipenem	Imipenem	12	B3	1	1	0.17
Imipenem	Imipenem	12	B3	2	1	0.17
Imipenem	Imipenem	12	B3	3	1	0.66
Imipenem	Imipenem	12	P1	1	1	0.33
Imipenem	Imipenem	12	P1	2	1	0.33
Imipenem	Imipenem	12	P1	3	1	0.66
Imipenem	Imipenem	12	P2	1	1	1.33
Imipenem	Imipenem	12	P2	2	1	1.33
Imipenem	Imipenem	12	P2	3	1	0.66
Imipenem	Imipenem	12	P3	1	1	1.33
Imipenem	Imipenem	12	P3	2	1	0.66
Imipenem	Imipenem	12	P3	3	1	0.66
Imipenem	Imipenem	12	B1	1	2	0.332
Imipenem	Imipenem	12	B1	2	2	0.33
Imipenem	Imipenem	12	B1	3	2	0.33
Imipenem	Imipenem	12	B2	1	2	0.33
Imipenem	Imipenem	12	B2	2	2	0.33
Imipenem	Imipenem	12	B2	3	2	0.33
Imipenem	Imipenem	12	B3	1	2	0.17
Imipenem	Imipenem	12	B3	2	2	0.17
Imipenem	Imipenem	12	B3	3	2	0.66
Imipenem	Imipenem	12	P1	1	2	0.33
Imipenem	Imipenem	12	P1	2	2	0.33
Imipenem	Imipenem	12	P1	3	2	0.66
Imipenem	Imipenem	12	P2	1	2	1.33
Imipenem	Imipenem	12	P2	2	2	1.33
Imipenem	Imipenem	12	P2	3	2	0.66
Imipenem	Imipenem	12	P3	1	2	1.33
Imipenem	Imipenem	12	P3	2	2	0.66
Imipenem	Imipenem	12	P3	3	2	0.66
Imipenem	Imipenem	12	B1	1	3	0.332
Imipenem	Imipenem	12	B1	2	3	0.33
Imipenem	Imipenem	12	B1	3	3	0.33
Imipenem	Imipenem	12	B2	1	3	0.33
Imipenem	Imipenem	12	B2	2	3	0.33
Imipenem	Imipenem	12	B2	3	3	0.33
Imipenem	Imipenem	12	B3	1	3	0.17
Imipenem	Imipenem	12	B3	2	3	0.17
Imipenem	Imipenem	12	B3	3	3	0.66
Imipenem	Imipenem	12	P1	1	3	0.33
Imipenem	Imipenem	12	P1	2	3	0.33
Imipenem	Imipenem	12	P1	3	3	0.66
Imipenem	Imipenem	12	P2	1	3	1.33
Imipenem	Imipenem	12	P2	2	3	1.33
Imipenem	Imipenem	12	P2	3	3	0.66
Imipenem	Imipenem	12	P3	1	3	1.33
Imipenem	Imipenem	12	P3	2	3	0.66
Imipenem	Imipenem	12	P3	3	3	0.66
Imipenem	Ciprofloxacin	0	B1	0	1	0.5
Imipenem	Ciprofloxacin	0	B1	0	2	0.25
Imipenem	Ciprofloxacin	0	B1	0	3	0.25
Imipenem	Ciprofloxacin	0	B2	0	1	1
Imipenem	Ciprofloxacin	0	B2	0	2	1
Imipenem	Ciprofloxacin	0	B2	0	3	1
Imipenem	Ciprofloxacin	0	B3	0	1	0.5
Imipenem	Ciprofloxacin	0	B3	0	2	0.5
Imipenem	Ciprofloxacin	0	B3	0	3	0.5
Imipenem	Ciprofloxacin	0	P1	0	1	8
Imipenem	Ciprofloxacin	0	P1	0	2	16
Imipenem	Ciprofloxacin	0	P1	0	3	8
Imipenem	Ciprofloxacin	0	P2	0	1	4
Imipenem	Ciprofloxacin	0	P2	0	2	4
Imipenem	Ciprofloxacin	0	P2	0	3	8
Imipenem	Ciprofloxacin	0	P3	0	1	16
Imipenem	Ciprofloxacin	0	P3	0	2	16
Imipenem	Ciprofloxacin	0	P3	0	3	8
Imipenem	Ciprofloxacin	12	B1	1	1	0.25
Imipenem	Ciprofloxacin	12	B1	2	1	0.5
Imipenem	Ciprofloxacin	12	B1	3	1	0.25
Imipenem	Ciprofloxacin	12	B2	1	1	0.5
Imipenem	Ciprofloxacin	12	B2	2	1	0.25
Imipenem	Ciprofloxacin	12	B2	3	1	0.13
Imipenem	Ciprofloxacin	12	B3	1	1	0.13
Imipenem	Ciprofloxacin	12	B3	2	1	0.06
Imipenem	Ciprofloxacin	12	B3	3	1	0.06
Imipenem	Ciprofloxacin	12	P1	1	1	16.03
Imipenem	Ciprofloxacin	12	P1	2	1	8.02
Imipenem	Ciprofloxacin	12	P1	3	1	16.03
Imipenem	Ciprofloxacin	12	P2	1	1	4.01
Imipenem	Ciprofloxacin	12	P2	2	1	4.01
Imipenem	Ciprofloxacin	12	P2	3	1	8.02
Imipenem	Ciprofloxacin	12	P3	1	1	4.01
Imipenem	Ciprofloxacin	12	P3	2	1	8.02
Imipenem	Ciprofloxacin	12	P3	3	1	8.02
Imipenem	Ciprofloxacin	12	B1	1	2	0.5
Imipenem	Ciprofloxacin	12	B1	2	2	0.5
Imipenem	Ciprofloxacin	12	B1	3	2	0.5
Imipenem	Ciprofloxacin	12	B2	1	2	0.5
Imipenem	Ciprofloxacin	12	B2	2	2	0.5
Imipenem	Ciprofloxacin	12	B2	3	2	0.06
Imipenem	Ciprofloxacin	12	B3	1	2	0.13
Imipenem	Ciprofloxacin	12	B3	2	2	0.06
Imipenem	Ciprofloxacin	12	B3	3	2	0.06
Imipenem	Ciprofloxacin	12	P1	1	2	16.03
Imipenem	Ciprofloxacin	12	P1	2	2	16.03
Imipenem	Ciprofloxacin	12	P1	3	2	16.03
Imipenem	Ciprofloxacin	12	P2	1	2	0
Imipenem	Ciprofloxacin	12	P2	2	2	4.01
Imipenem	Ciprofloxacin	12	P2	3	2	4.01
Imipenem	Ciprofloxacin	12	P3	1	2	4.01
Imipenem	Ciprofloxacin	12	P3	2	2	8.02
Imipenem	Ciprofloxacin	12	P3	3	2	8.02
Imipenem	Ciprofloxacin	12	B1	1	3	0.5
Imipenem	Ciprofloxacin	12	B1	2	3	0.5
Imipenem	Ciprofloxacin	12	B1	3	3	0.5
Imipenem	Ciprofloxacin	12	B2	1	3	0.5
Imipenem	Ciprofloxacin	12	B2	2	3	0.5
Imipenem	Ciprofloxacin	12	B2	3	3	0.13
Imipenem	Ciprofloxacin	12	B3	1	3	0.13
Imipenem	Ciprofloxacin	12	B3	2	3	0.13
Imipenem	Ciprofloxacin	12	B3	3	3	0.06
Imipenem	Ciprofloxacin	12	P1	1	3	16.03
Imipenem	Ciprofloxacin	12	P1	2	3	8.02
Imipenem	Ciprofloxacin	12	P1	3	3	16.03
Imipenem	Ciprofloxacin	12	P2	1	3	4.01
Imipenem	Ciprofloxacin	12	P2	2	3	4.01
Imipenem	Ciprofloxacin	12	P2	3	3	4.01
Imipenem	Ciprofloxacin	12	P3	1	3	4.01
Imipenem	Ciprofloxacin	12	P3	2	3	8.02
Imipenem	Ciprofloxacin	12	P3	3	3	8.02
Imipenem	Ceftazidime	0	B1	0	1	4
Imipenem	Ceftazidime	0	B1	0	2	4
Imipenem	Ceftazidime	0	B1	0	3	8
Imipenem	Ceftazidime	0	B2	0	1	2
Imipenem	Ceftazidime	0	B2	0	2	2
Imipenem	Ceftazidime	0	B2	0	3	4
Imipenem	Ceftazidime	0	B3	0	1	4
Imipenem	Ceftazidime	0	B3	0	2	4
Imipenem	Ceftazidime	0	B3	0	3	4
Imipenem	Ceftazidime	0	P1	0	1	16
Imipenem	Ceftazidime	0	P1	0	2	16
Imipenem	Ceftazidime	0	P1	0	3	16
Imipenem	Ceftazidime	0	P2	0	1	8
Imipenem	Ceftazidime	0	P2	0	2	16
Imipenem	Ceftazidime	0	P2	0	3	8
Imipenem	Ceftazidime	0	P3	0	1	4
Imipenem	Ceftazidime	0	P3	0	2	2
Imipenem	Ceftazidime	0	P3	0	3	8
Imipenem	Ceftazidime	12	B1	1	1	4
Imipenem	Ceftazidime	12	B1	2	1	8
Imipenem	Ceftazidime	12	B1	3	1	8
Imipenem	Ceftazidime	12	B2	1	1	4
Imipenem	Ceftazidime	12	B2	2	1	2
Imipenem	Ceftazidime	12	B2	3	1	4
Imipenem	Ceftazidime	12	B3	1	1	4
Imipenem	Ceftazidime	12	B3	2	1	2
Imipenem	Ceftazidime	12	B3	3	1	2
Imipenem	Ceftazidime	12	P1	1	1	16
Imipenem	Ceftazidime	12	P1	2	1	16
Imipenem	Ceftazidime	12	P1	3	1	8
Imipenem	Ceftazidime	12	P2	1	1	16
Imipenem	Ceftazidime	12	P2	2	1	64
Imipenem	Ceftazidime	12	P2	3	1	16
Imipenem	Ceftazidime	12	P3	1	1	8
Imipenem	Ceftazidime	12	P3	2	1	4
Imipenem	Ceftazidime	12	P3	3	1	2
Imipenem	Ceftazidime	12	B1	1	2	4
Imipenem	Ceftazidime	12	B1	2	2	4
Imipenem	Ceftazidime	12	B1	3	2	8
Imipenem	Ceftazidime	12	B2	1	2	4
Imipenem	Ceftazidime	12	B2	2	2	2
Imipenem	Ceftazidime	12	B2	3	2	4
Imipenem	Ceftazidime	12	B3	1	2	4
Imipenem	Ceftazidime	12	B3	2	2	2
Imipenem	Ceftazidime	12	B3	3	2	2
Imipenem	Ceftazidime	12	P1	1	2	16
Imipenem	Ceftazidime	12	P1	2	2	8
Imipenem	Ceftazidime	12	P1	3	2	4
Imipenem	Ceftazidime	12	P2	1	2	16
Imipenem	Ceftazidime	12	P2	2	2	32
Imipenem	Ceftazidime	12	P2	3	2	8
Imipenem	Ceftazidime	12	P3	1	2	8
Imipenem	Ceftazidime	12	P3	2	2	4
Imipenem	Ceftazidime	12	P3	3	2	2
Imipenem	Ceftazidime	12	B1	1	3	4
Imipenem	Ceftazidime	12	B1	2	3	4
Imipenem	Ceftazidime	12	B1	3	3	8
Imipenem	Ceftazidime	12	B2	1	3	4
Imipenem	Ceftazidime	12	B2	2	3	2
Imipenem	Ceftazidime	12	B2	3	3	4
Imipenem	Ceftazidime	12	B3	1	3	4
Imipenem	Ceftazidime	12	B3	2	3	2
Imipenem	Ceftazidime	12	B3	3	3	2
Imipenem	Ceftazidime	12	P1	1	3	16
Imipenem	Ceftazidime	12	P1	2	3	8
Imipenem	Ceftazidime	12	P1	3	3	4
Imipenem	Ceftazidime	12	P2	1	3	16
Imipenem	Ceftazidime	12	P2	2	3	64
Imipenem	Ceftazidime	12	P2	3	3	8
Imipenem	Ceftazidime	12	P3	1	3	8
Imipenem	Ceftazidime	12	P3	2	3	4
Imipenem	Ceftazidime	12	P3	3	3	2
