# Supplementary material for: The roles of history, chance, and natural selection in the evolution of antibiotic resistance
Source: eLife. 2021 Aug 25;10:e70676. doi: 10.7554/eLife.70676 (PMC8412936; doi:10.7554/eLife.70676)
Supplement: Figure 4—source data 2. [file elife-70676-fig4-data2.xlsx]

## Sheet: Fig4-sourcedata2
number	sample_name	replicate	day	biofilm_planktonic	xmic	antibiotic	gene_name	gene_position	type	mutation	gene_product	frequency	mutation_category	new_seq	position	seq_id	size	snp_type	title	aa_new_seq	aa_position	aa_ref_seq	codon_new_seq	codon_number	codon_position	codon_ref_seq
48	ANC_2	0	12	P	0	imp/cef	ACX60_RS00600	coding (85-87/183 nt)	DEL	:NA:	hypothetical protein	0.0607015	small_indel		131198	NZ_CP012004	3		breseq_48		NA			NA	NA
48	ANC_2	0	12	P	0	imp/cef	ACX60_RS02425	1067	SNP	*:356:L	hypothetical protein	0.123192	snp_nonsynonymous	T	495717	NZ_CP012004	NA	nonsynonymous	breseq_48	L	356	*	TTA	356	2	TGA
48	ANC_2	0	12	P	0	imp/cef	ACX60_RS02770	1299	SNP	S:433:S	copper oxidase	0.0549874	snp_synonymous	T	563384	NZ_CP012004	NA	synonymous	breseq_48	S	433	S	TCT	433	3	TCA
48	ANC_2	0	12	P	0	imp/cef	ACX60_RS04595	701	SNP	K:234:R	protein TolA	0.0628905	snp_nonsynonymous	C	969559	NZ_CP012004	NA	nonsynonymous	breseq_48	R	234	K	AGA	234	2	AAA
48	ANC_2	0	12	P	0	imp/cef	ACX60_RS05695	620	SNP	A:207:V	membrane protein	0.209786	snp_nonsynonymous	T	1226842	NZ_CP012004	NA	nonsynonymous	breseq_48	V	207	A	GTT	207	2	GCT
47	ANC_1	0	12	P	0	imp/cef	ACX60_RS00605	coding (644-742/2439 nt)	DEL	:NA:	peptidase, M23 family protein	1	large_deletion		131913	NZ_CP012004	99		breseq_47		NA			NA	NA
47	ANC_1	0	12	P	0	imp/cef	ACX60_RS02305	1503	SNP	I:501:I	hypothetical protein	0.100639	snp_synonymous	G	472038	NZ_CP012004	NA	synonymous	breseq_47	I	501	I	ATC	501	3	ATT
47	ANC_1	0	12	P	0	imp/cef	ACX60_RS02305	1309	SNP	I:437:V	hypothetical protein	0.0835528	snp_nonsynonymous	C	472232	NZ_CP012004	NA	nonsynonymous	breseq_47	V	437	I	GTT	437	1	ATT
47	ANC_1	0	12	P	0	imp/cef	ACX60_RS02770	1186	SNP	E:396:Q	copper oxidase	0.100309	snp_nonsynonymous	C	563271	NZ_CP012004	NA	nonsynonymous	breseq_47	Q	396	E	CAA	396	1	GAA
47	ANC_1	0	12	P	0	imp/cef	ACX60_RS05695	620	SNP	A:207:V	membrane protein	0.425305	snp_nonsynonymous	T	1226842	NZ_CP012004	NA	nonsynonymous	breseq_47	V	207	A	GTT	207	2	GCT
47	ANC_1	0	12	P	0	imp/cef	ACX60_RS07165/ACX60_RS07170	intergenic (+222/-77)	DEL	:NA:	mechanosensitive ion channel protein MscS/hypothetical protein	0.0701652	small_indel		1544685	NZ_CP012004	1		breseq_47		NA			NA	NA
46	P3_0	0	0	P	0	imp/cef	ACX60_RS02425	1067	SNP	*:356:L	hypothetical protein	0.104387	snp_nonsynonymous	T	495717	NZ_CP012004	NA	nonsynonymous	breseq_46	L	356	*	TTA	356	2	TGA
46	P3_0	0	0	P	0	imp/cef	ACX60_RS04430	242	SNP	S:81:L	DNA gyrase subunit A	1	snp_nonsynonymous	T	931336	NZ_CP012004	NA	nonsynonymous	breseq_46	L	81	S	TTA	81	2	TCA
46	P3_0	0	0	P	0	imp/cef	ACX60_RS05150	132	SNP	Q:44:H	deoxyribodipyrimidine photo-lyase	0.0652366	snp_nonsynonymous	G	1091638	NZ_CP012004	NA	nonsynonymous	breseq_46	H	44	Q	CAC	44	3	CAA
46	P3_0	0	0	P	0	imp/cef	ACX60_RS17100	251	SNP	S:84:L	DNA topoisomerase IV subunit A	1	snp_nonsynonymous	A	3626451	NZ_CP012004	NA	nonsynonymous	breseq_46	L	84	S	TTG	84	2	TCG
44	P2_0	0	0	P	0	imp/cef	ACX60_RS00600	coding (85-87/183 nt)	DEL	:NA:	hypothetical protein	0.0567333	small_indel		131198	NZ_CP012004	3		breseq_44		NA			NA	NA
44	P2_0	0	0	P	0	imp/cef	ACX60_RS02770	1299	SNP	S:433:S	copper oxidase	0.0687971	snp_synonymous	T	563384	NZ_CP012004	NA	synonymous	breseq_44	S	433	S	TCT	433	3	TCA
44	P2_0	0	0	P	0	imp/cef	ACX60_RS03010	693	SNP	A:231:A	glycosyl transferase	0.114011	snp_synonymous	G	617500	NZ_CP012004	NA	synonymous	breseq_44	A	231	A	GCG	231	3	GCT
44	P2_0	0	0	P	0	imp/cef	ACX60_RS03840	421	SNP	H:141:Y	phosphatidylglycerophosphatase	1	snp_nonsynonymous	A	797959	NZ_CP012004	NA	nonsynonymous	breseq_44	Y	141	H	TAT	141	1	CAT
44	P2_0	0	0	P	0	imp/cef	ACX60_RS04430	242	SNP	S:81:L	DNA gyrase subunit A	1	snp_nonsynonymous	T	931336	NZ_CP012004	NA	nonsynonymous	breseq_44	L	81	S	TTA	81	2	TCA
43	P1_0	0	0	P	0	imp/cef	ACX60_RS00605	coding (644-742/2439 nt)	DEL	:NA:	peptidase, M23 family protein	0.123588	large_deletion		131913	NZ_CP012004	99		breseq_43		NA			NA	NA
43	P1_0	0	0	P	0	imp/cef	ACX60_RS02305	1488	SNP	G:496:G	hypothetical protein	0.119462	snp_synonymous	G	472053	NZ_CP012004	NA	synonymous	breseq_43	G	496	G	GGC	496	3	GGT
43	P1_0	0	0	P	0	imp/cef	ACX60_RS02305	1309	SNP	I:437:V	hypothetical protein	0.124435	snp_nonsynonymous	C	472232	NZ_CP012004	NA	nonsynonymous	breseq_43	V	437	I	GTT	437	1	ATT
43	P1_0	0	0	P	0	imp/cef	ACX60_RS02770	1299	SNP	S:433:S	copper oxidase	0.0665379	snp_synonymous	T	563384	NZ_CP012004	NA	synonymous	breseq_43	S	433	S	TCT	433	3	TCA
43	P1_0	0	0	P	0	imp/cef	ACX60_RS04430	242	SNP	S:81:L	DNA gyrase subunit A	1	snp_nonsynonymous	T	931336	NZ_CP012004	NA	nonsynonymous	breseq_43	L	81	S	TTA	81	2	TCA
43	P1_0	0	0	P	0	imp/cef	ACX60_RS07310	coding (1342-1437/2121 nt)	DEL	:NA:	DNA polymerase III subunit gamma/tau	0.307629	large_deletion		1574859	NZ_CP012004	96		breseq_43		NA			NA	NA
43	P1_0	0	0	P	0	imp/cef	ACX60_RS19285/ACX60_RS15145	intergenic (-44/-11)	SNP	:NA:	hypothetical protein/MFS transporter	1	snp_intergenic	G	3199253	NZ_CP012004	NA	intergenic	breseq_43		NA			NA	NA
41	B3_0	0	0	B	0	imp/cef	ACX60_RS00605	coding (644-742/2439 nt)	DEL	:NA:	peptidase, M23 family protein	0.135076	large_deletion		131913	NZ_CP012004	99		breseq_41		NA			NA	NA
41	B3_0	0	0	B	0	imp/cef	ACX60_RS02305	1309	SNP	I:437:V	hypothetical protein	0.13865	snp_nonsynonymous	C	472232	NZ_CP012004	NA	nonsynonymous	breseq_41	V	437	I	GTT	437	1	ATT
41	B3_0	0	0	B	0	imp/cef	ACX60_RS02770	1299	SNP	S:433:S	copper oxidase	0.0605164	snp_synonymous	T	563384	NZ_CP012004	NA	synonymous	breseq_41	S	433	S	TCT	433	3	TCA
41	B3_0	0	0	B	0	imp/cef	ACX60_RS05150	132	SNP	Q:44:H	deoxyribodipyrimidine photo-lyase	0.0576525	snp_nonsynonymous	G	1091638	NZ_CP012004	NA	nonsynonymous	breseq_41	H	44	Q	CAC	44	3	CAA
41	B3_0	0	0	B	0	imp/cef	ACX60_RS06025	1022	SNP	L:341:R	LysR family transcriptional regulator	1	snp_nonsynonymous	G	1304900	NZ_CP012004	NA	nonsynonymous	breseq_41	R	341	L	CGC	341	2	CTC
39	B2_0	0	0	B	0	imp/cef	ACX60_RS00605	coding (644-751/2439 nt)	DEL	:NA:	peptidase, M23 family protein	0.082912	large_deletion		131913	NZ_CP012004	108		breseq_39		NA			NA	NA
39	B2_0	0	0	B	0	imp/cef	ACX60_RS02305	1309	SNP	I:437:V	hypothetical protein	0.124952	snp_nonsynonymous	C	472232	NZ_CP012004	NA	nonsynonymous	breseq_39	V	437	I	GTT	437	1	ATT
39	B2_0	0	0	B	0	imp/cef	ACX60_RS02305	1278	SNP	P:426:P	hypothetical protein	0.0512366	snp_synonymous	A	472263	NZ_CP012004	NA	synonymous	breseq_39	P	426	P	CCT	426	3	CCG
39	B2_0	0	0	B	0	imp/cef	ACX60_RS05355	coding (617/963 nt)	INS	:NA:	protease SohB	0.0886712	small_indel	A	1142620	NZ_CP012004	NA		breseq_39		NA			NA	NA
39	B2_0	0	0	B	0	imp/cef	ACX60_RS05355	coding (617/963 nt)	INS	:NA:	protease SohB	0.0886703	small_indel	G	1142620	NZ_CP012004	NA		breseq_39		NA			NA	NA
39	B2_0	0	0	B	0	imp/cef	ACX60_RS06025	250	SNP	H:84:Y	LysR family transcriptional regulator	0.9092	snp_nonsynonymous	T	1304128	NZ_CP012004	NA	nonsynonymous	breseq_39	Y	84	H	TAT	84	1	CAT
39	B2_0	0	0	B	0	imp/cef	ACX60_RS06025	coding (251-262/1032 nt)	DEL	:NA:	LysR family transcriptional regulator	0.0890143	small_indel		1304129	NZ_CP012004	12		breseq_39		NA			NA	NA
39	B2_0	0	0	B	0	imp/cef	ACX60_RS06025	coding (944/1032 nt)	INS	:NA:	LysR family transcriptional regulator	0.913305	small_indel	TTGC	1304822	NZ_CP012004	NA		breseq_39		NA			NA	NA
39	B2_0	0	0	B	0	imp/cef	ACX60_RS08625	354	SNP	G:118:G	MFS transporter	0.057879	snp_synonymous	G	1831861	NZ_CP012004	NA	synonymous	breseq_39	G	118	G	GGG	118	3	GGT
39	B2_0	0	0	B	0	imp/cef	ACX60_RS13425	588	SNP	L:196:L	RNA degradosome polyphosphate kinase	0.0507998	snp_synonymous	T	2825024	NZ_CP012004	NA	synonymous	breseq_39	L	196	L	TTA	196	3	TTG
39	B2_0	0	0	B	0	imp/cef	ACX60_RS13425	585	SNP	S:195:S	RNA degradosome polyphosphate kinase	0.0511746	snp_synonymous	C	2825027	NZ_CP012004	NA	synonymous	breseq_39	S	195	S	TCG	195	3	TCA
37	B1_0	0	0	B	0	imp/cef	ACX60_RS02770	1299	SNP	S:433:S	copper oxidase	0.0578251	snp_synonymous	T	563384	NZ_CP012004	NA	synonymous	breseq_37	S	433	S	TCT	433	3	TCA
37	B1_0	0	0	B	0	imp/cef	ACX60_RS05355	coding (82/963 nt)	DEL	:NA:	protease SohB	1	small_indel		1142085	NZ_CP012004	1		breseq_37		NA			NA	NA
37	B1_0	0	0	B	0	imp/cef	ACX60_RS06025	coding (251-262/1032 nt)	DEL	:NA:	LysR family transcriptional regulator	1	small_indel		1304129	NZ_CP012004	12		breseq_37		NA			NA	NA
37	B1_0	0	0	B	0	imp/cef	ACX60_RS06950	501	SNP	R:167:R	LysR family transcriptional regulator	0.0942016	snp_synonymous	G	1497631	NZ_CP012004	NA	synonymous	breseq_37	R	167	R	CGG	167	3	CGT
37	B1_0	0	0	B	0	imp/cef	ACX60_RS07895	530	SNP	G:177:V	TetR family transcriptional regulator	0.901267	snp_nonsynonymous	A	1678417	NZ_CP012004	NA	nonsynonymous	breseq_37	V	177	G	GTA	177	2	GGA
37	B1_0	0	0	B	0	imp/cef	ACX60_RS07895	437	SNP	V:146:A	TetR family transcriptional regulator	0.108373	snp_nonsynonymous	G	1678510	NZ_CP012004	NA	nonsynonymous	breseq_37	A	146	V	GCC	146	2	GTC
37	B1_0	0	0	B	0	imp/cef	ACX60_RS11415	348	SNP	A:116:A	phenylacetic acid degradation protein PaaD	0.0678725	snp_synonymous	C	2395209	NZ_CP012004	NA	synonymous	breseq_37	A	116	A	GCG	116	3	GCT
37	B1_0	0	0	B	0	imp/cef	ACX60_RS18150/ACX60_RS18155	intergenic (+9/+44)	SNP	:NA:	GlsB/YeaQ/YmgE family stress response membrane protein/thiol:disulfide interchange protein	0.0578732	snp_intergenic	C	3850871	NZ_CP012004	NA	intergenic	breseq_37		NA			NA	NA
36	P3_3c	3	12	P	4	ceftazidime	ACX60_RS03830	407	SNP	F:136:S	AdeB/AdeJ family multidrug efflux RND transporter permease subunit	1	snp_nonsynonymous	G	796059	NZ_CP012004	NA	nonsynonymous	breseq_36	S	136	F	TCC	136	2	TTC
36	P3_3c	3	12	P	4	ceftazidime	ACX60_RS03840	421	SNP	H:141:Y	phosphatidylglycerophosphatase	1	snp_nonsynonymous	A	797959	NZ_CP012004	NA	nonsynonymous	breseq_36	Y	141	H	TAT	141	1	CAT
36	P3_3c	3	12	P	4	ceftazidime	ACX60_RS04430	242	SNP	S:81:L	DNA gyrase subunit A	1	snp_nonsynonymous	T	931336	NZ_CP012004	NA	nonsynonymous	breseq_36	L	81	S	TTA	81	2	TCA
35	P3_2c	2	12	P	4	ceftazidime	ACX60_RS00640	196	SNP	Q:66:K	hypothetical protein	0.0509958	snp_nonsynonymous	T	138604	NZ_CP012004	NA	nonsynonymous	breseq_35	K	66	Q	AAA	66	1	CAA
35	P3_2c	2	12	P	4	ceftazidime	ACX60_RS02390	385	SNP	R:129:C	hypothetical protein	1	snp_nonsynonymous	T	489649	NZ_CP012004	NA	nonsynonymous	breseq_35	C	129	R	TGT	129	1	CGT
35	P3_2c	2	12	P	4	ceftazidime	ACX60_RS02425	1067	SNP	*:356:L	hypothetical protein	0.145096	snp_nonsynonymous	T	495717	NZ_CP012004	NA	nonsynonymous	breseq_35	L	356	*	TTA	356	2	TGA
35	P3_2c	2	12	P	4	ceftazidime	ACX60_RS03830	2023	SNP	E:675:K	AdeB/AdeJ family multidrug efflux RND transporter permease subunit	1	snp_nonsynonymous	T	794443	NZ_CP012004	NA	nonsynonymous	breseq_35	K	675	E	AAA	675	1	GAA
35	P3_2c	2	12	P	4	ceftazidime	ACX60_RS03840	421	SNP	H:141:Y	phosphatidylglycerophosphatase	1	snp_nonsynonymous	A	797959	NZ_CP012004	NA	nonsynonymous	breseq_35	Y	141	H	TAT	141	1	CAT
35	P3_2c	2	12	P	4	ceftazidime	ACX60_RS04430	242	SNP	S:81:L	DNA gyrase subunit A	1	snp_nonsynonymous	T	931336	NZ_CP012004	NA	nonsynonymous	breseq_35	L	81	S	TTA	81	2	TCA
34	P3_1c	1	12	P	4	ceftazidime	A1S_3470/â€“	intergenic (-245/â€“)	INS	:NA:	regulatory protein LysR/â€“	0.0908643	small_indel	TGCACTTAAT	12689	NC_009083	NA		breseq_34		NA			NA	NA
34	P3_1c	1	12	P	4	ceftazidime	ACX60_RS02305	1470	SNP	V:490:V	hypothetical protein	0.102977	snp_synonymous	A	472071	NZ_CP012004	NA	synonymous	breseq_34	V	490	V	GTT	490	3	GTG
34	P3_1c	1	12	P	4	ceftazidime	ACX60_RS02770	1186	SNP	E:396:Q	copper oxidase	0.110014	snp_nonsynonymous	C	563271	NZ_CP012004	NA	nonsynonymous	breseq_34	Q	396	E	CAA	396	1	GAA
34	P3_1c	1	12	P	4	ceftazidime	ACX60_RS03830	472	SNP	V:158:L	AdeB/AdeJ family multidrug efflux RND transporter permease subunit	0.768751	snp_nonsynonymous	A	795994	NZ_CP012004	NA	nonsynonymous	breseq_34	L	158	V	TTA	158	1	GTA
34	P3_1c	1	12	P	4	ceftazidime	ACX60_RS03830	282	SNP	F:94:L	AdeB/AdeJ family multidrug efflux RND transporter permease subunit	0.283199	snp_nonsynonymous	C	796184	NZ_CP012004	NA	nonsynonymous	breseq_34	L	94	F	TTG	94	3	TTT
34	P3_1c	1	12	P	4	ceftazidime	ACX60_RS03840	421	SNP	H:141:Y	phosphatidylglycerophosphatase	1	snp_nonsynonymous	A	797959	NZ_CP012004	NA	nonsynonymous	breseq_34	Y	141	H	TAT	141	1	CAT
34	P3_1c	1	12	P	4	ceftazidime	ACX60_RS04430	242	SNP	S:81:L	DNA gyrase subunit A	1	snp_nonsynonymous	T	931336	NZ_CP012004	NA	nonsynonymous	breseq_34	L	81	S	TTA	81	2	TCA
33	P2_3c	3	12	P	4	ceftazidime	ACX60_RS02770	1299	SNP	S:433:S	copper oxidase	0.0601063	snp_synonymous	T	563384	NZ_CP012004	NA	synonymous	breseq_33	S	433	S	TCT	433	3	TCA
33	P2_3c	3	12	P	4	ceftazidime	ACX60_RS03175	662	SNP	V:221:E	SPOR domain-containing protein	0.117962	snp_nonsynonymous	A	653899	NZ_CP012004	NA	nonsynonymous	breseq_33	E	221	V	GAG	221	2	GTG
33	P2_3c	3	12	P	4	ceftazidime	ACX60_RS03830	1418	SNP	T:473:I	AdeB/AdeJ family multidrug efflux RND transporter permease subunit	1	snp_nonsynonymous	A	795048	NZ_CP012004	NA	nonsynonymous	breseq_33	I	473	T	ATC	473	2	ACC
33	P2_3c	3	12	P	4	ceftazidime	ACX60_RS03840	421	SNP	H:141:Y	phosphatidylglycerophosphatase	1	snp_nonsynonymous	A	797959	NZ_CP012004	NA	nonsynonymous	breseq_33	Y	141	H	TAT	141	1	CAT
33	P2_3c	3	12	P	4	ceftazidime	ACX60_RS04430	242	SNP	S:81:L	DNA gyrase subunit A	1	snp_nonsynonymous	T	931336	NZ_CP012004	NA	nonsynonymous	breseq_33	L	81	S	TTA	81	2	TCA
32	P2_2c	2	12	P	4	ceftazidime	ACX60_RS01490	coding(10721074/1833nt)	JC	:NA:	peptide ABC transporter permease	1	small_indel		310768	NZ_CP012004	3		breseq_20n					NA	NA
32	P2_2c	2	12	P	4	ceftazidime	ACX60_RS02390	coding(39/663nt)	SNP	G:496:G	hypothetical protein	1	small_indel		489303	NZ_CP012004	1		breseq_20n
32	P2_2c	2	12	P	4	ceftazidime	ACX60_RS03840		SNP	H:141:Y	phosphatidylglycerophosphatase	1	snp_nonsynonymous	Y	797959	NZ_CP012004	NA	nonsynonymous	breseq_20n	Y		H	CAT			TAT
32	P2_2c	2	12	P	4	ceftazidime	ACX60_RS04430		SNP	S:81:L	DNA gyrase subunit A	1	snp_nonsynonymous	L	931336	NZ_CP012004	NA	nonsynonymous	breseq_20n	L		S	TCA			TTA
32	P2_2c	2	12	P	4	ceftazidime	ACX60_RS08500		SNP	A:312:A	GlutRNA amidotransferase	0.066	snp_synonymous	A	1804218	NZ_CP012004	NA	synonymous	breseq_20n	A		A	GCT			GCG
32	P2_2c	2	12	P	4	ceftazidime	ACX60_RS18975		DEL	V:188:D	hypothetical protein	0.068	snp_synonymous	D	147112	NZ_CP012004	NA	synonymous	breseq_20n	D		D	GTT			GAT
31	P2_1c	1	12	P	4	ceftazidime	ACX60_RS02590	coding (284/504 nt)	INS	:NA:	hypothetical protein	0.122092	small_indel	TAG	527515	NZ_CP012004	NA		breseq_31		NA			NA	NA
31	P2_1c	1	12	P	4	ceftazidime	ACX60_RS02770	1299	SNP	S:433:S	copper oxidase	0.0542483	snp_synonymous	T	563384	NZ_CP012004	NA	synonymous	breseq_31	S	433	S	TCT	433	3	TCA
31	P2_1c	1	12	P	4	ceftazidime	ACX60_RS03765/ACX60_RS03770	intergenic (-97/+56)	SNP	:NA:	hypothetical protein/ammonium transporter	0.0638776	snp_intergenic	A	780486	NZ_CP012004	NA	intergenic	breseq_31		NA			NA	NA
31	P2_1c	1	12	P	4	ceftazidime	ACX60_RS03830	1418	SNP	T:473:I	AdeB/AdeJ family multidrug efflux RND transporter permease subunit	1	snp_nonsynonymous	A	795048	NZ_CP012004	NA	nonsynonymous	breseq_31	I	473	T	ATC	473	2	ACC
31	P2_1c	1	12	P	4	ceftazidime	ACX60_RS03840	421	SNP	H:141:Y	phosphatidylglycerophosphatase	1	snp_nonsynonymous	A	797959	NZ_CP012004	NA	nonsynonymous	breseq_31	Y	141	H	TAT	141	1	CAT
31	P2_1c	1	12	P	4	ceftazidime	ACX60_RS04430	242	SNP	S:81:L	DNA gyrase subunit A	1	snp_nonsynonymous	T	931336	NZ_CP012004	NA	nonsynonymous	breseq_31	L	81	S	TTA	81	2	TCA
31	P2_1c	1	12	P	4	ceftazidime	ACX60_RS06950	501	SNP	R:167:R	LysR family transcriptional regulator	0.087008	snp_synonymous	G	1497631	NZ_CP012004	NA	synonymous	breseq_31	R	167	R	CGG	167	3	CGT
30	P1_3c	3	12	P	4	ceftazidime	ACX60_RS00600	coding (85-87/183 nt)	DEL	:NA:	hypothetical protein	0.0516225	small_indel		131198	NZ_CP012004	3		breseq_30		NA			NA	NA
30	P1_3c	3	12	P	4	ceftazidime	ACX60_RS03830	3019	SNP	G:1007:S	AdeB/AdeJ family multidrug efflux RND transporter permease subunit	1	snp_nonsynonymous	T	793447	NZ_CP012004	NA	nonsynonymous	breseq_30	S	1007	G	AGT	1007	1	GGT
30	P1_3c	3	12	P	4	ceftazidime	ACX60_RS04430	242	SNP	S:81:L	DNA gyrase subunit A	1	snp_nonsynonymous	T	931336	NZ_CP012004	NA	nonsynonymous	breseq_30	L	81	S	TTA	81	2	TCA
30	P1_3c	3	12	P	4	ceftazidime	ACX60_RS13425	450	SNP	L:150:F	RNA degradosome polyphosphate kinase	0.0516529	snp_nonsynonymous	A	2825162	NZ_CP012004	NA	nonsynonymous	breseq_30	F	150	L	TTT	150	3	TTA
30	P1_3c	3	12	P	4	ceftazidime	ACX60_RS19285/ACX60_RS15145	intergenic (-44/-11)	SNP	:NA:	hypothetical protein/MFS transporter	1	snp_intergenic	G	3199253	NZ_CP012004	NA	intergenic	breseq_30		NA			NA	NA
29	P1_2c	2	12	P	4	ceftazidime	ACX60_RS02390	coding (356/663 nt)	INS	:NA:	hypothetical protein	1	small_indel	GCTG	489620	NZ_CP012004	NA		breseq_29		NA			NA	NA
29	P1_2c	2	12	P	4	ceftazidime	ACX60_RS03830	1417	SNP	T:473:P	AdeB/AdeJ family multidrug efflux RND transporter permease subunit	1	snp_nonsynonymous	G	795049	NZ_CP012004	NA	nonsynonymous	breseq_29	P	473	T	CCC	473	1	ACC
29	P1_2c	2	12	P	4	ceftazidime	ACX60_RS04430	242	SNP	S:81:L	DNA gyrase subunit A	1	snp_nonsynonymous	T	931336	NZ_CP012004	NA	nonsynonymous	breseq_29	L	81	S	TTA	81	2	TCA
29	P1_2c	2	12	P	4	ceftazidime	ACX60_RS12690	651	SNP	A:217:A	short-chain dehydrogenase	0.0533786	snp_synonymous	C	2648774	NZ_CP012004	NA	synonymous	breseq_29	A	217	A	GCG	217	3	GCA
29	P1_2c	2	12	P	4	ceftazidime	ACX60_RS12690	624	SNP	G:208:G	short-chain dehydrogenase	0.0501246	snp_synonymous	G	2648801	NZ_CP012004	NA	synonymous	breseq_29	G	208	G	GGC	208	3	GGG
29	P1_2c	2	12	P	4	ceftazidime	ACX60_RS12690	369	SNP	L:123:L	short-chain dehydrogenase	0.0541482	snp_synonymous	T	2649056	NZ_CP012004	NA	synonymous	breseq_29	L	123	L	CTA	123	3	CTG
29	P1_2c	2	12	P	4	ceftazidime	ACX60_RS12690	159	SNP	T:53:T	short-chain dehydrogenase	0.0519681	snp_synonymous	A	2649266	NZ_CP012004	NA	synonymous	breseq_29	T	53	T	ACT	53	3	ACC
29	P1_2c	2	12	P	4	ceftazidime	ACX60_RS12690	126	SNP	C:42:C	short-chain dehydrogenase	0.0794511	snp_synonymous	G	2649299	NZ_CP012004	NA	synonymous	breseq_29	C	42	C	TGC	42	3	TGT
29	P1_2c	2	12	P	4	ceftazidime	ACX60_RS12690	96	SNP	E:32:E	short-chain dehydrogenase	0.06212	snp_synonymous	T	2649329	NZ_CP012004	NA	synonymous	breseq_29	E	32	E	GAA	32	3	GAG
29	P1_2c	2	12	P	4	ceftazidime	ACX60_RS12690	91	SNP	V:31:I	short-chain dehydrogenase	0.0618949	snp_nonsynonymous	T	2649334	NZ_CP012004	NA	nonsynonymous	breseq_29	I	31	V	ATT	31	1	GTT
29	P1_2c	2	12	P	4	ceftazidime	ACX60_RS12690	84	SNP	S:28:S	short-chain dehydrogenase	0.0591612	snp_synonymous	A	2649341	NZ_CP012004	NA	synonymous	breseq_29	S	28	S	AGT	28	3	AGC
29	P1_2c	2	12	P	4	ceftazidime	ACX60_RS12690	72	SNP	G:24:G	short-chain dehydrogenase	0.0553842	snp_synonymous	T	2649353	NZ_CP012004	NA	synonymous	breseq_29	G	24	G	GGA	24	3	GGG
29	P1_2c	2	12	P	4	ceftazidime	ACX60_RS12690	69	SNP	S:23:S	short-chain dehydrogenase	0.0550823	snp_synonymous	G	2649356	NZ_CP012004	NA	synonymous	breseq_29	S	23	S	AGC	23	3	AGT
29	P1_2c	2	12	P	4	ceftazidime	ACX60_RS12695	294	SNP	G:98:G	metal-dependent hydrolase	0.0561004	snp_synonymous	T	2650159	NZ_CP012004	NA	synonymous	breseq_29	G	98	G	GGA	98	3	GGT
29	P1_2c	2	12	P	4	ceftazidime	ACX60_RS12695	286	SNP	L:96:L	metal-dependent hydrolase	0.0559955	snp_synonymous	A	2650167	NZ_CP012004	NA	synonymous	breseq_29	L	96	L	TTG	96	1	CTG
29	P1_2c	2	12	P	4	ceftazidime	ACX60_RS12695	285	SNP	S:95:S	metal-dependent hydrolase	0.055706	snp_synonymous	T	2650168	NZ_CP012004	NA	synonymous	breseq_29	S	95	S	TCA	95	3	TCG
29	P1_2c	2	12	P	4	ceftazidime	ACX60_RS12695	282	SNP	T:94:T	metal-dependent hydrolase	0.0538611	snp_synonymous	A	2650171	NZ_CP012004	NA	synonymous	breseq_29	T	94	T	ACT	94	3	ACA
29	P1_2c	2	12	P	4	ceftazidime	ACX60_RS12695	262	SNP	I:88:V	metal-dependent hydrolase	0.093051	snp_nonsynonymous	C	2650191	NZ_CP012004	NA	nonsynonymous	breseq_29	V	88	I	GTT	88	1	ATT
29	P1_2c	2	12	P	4	ceftazidime	ACX60_RS12695	261	SNP	P:87:P	metal-dependent hydrolase	0.092998	snp_synonymous	T	2650192	NZ_CP012004	NA	synonymous	breseq_29	P	87	P	CCA	87	3	CCG
29	P1_2c	2	12	P	4	ceftazidime	ACX60_RS12695	237	SNP	H:79:H	metal-dependent hydrolase	0.0921898	snp_synonymous	A	2650216	NZ_CP012004	NA	synonymous	breseq_29	H	79	H	CAT	79	3	CAC
29	P1_2c	2	12	P	4	ceftazidime	ACX60_RS12695	201	SNP	T:67:T	metal-dependent hydrolase	0.0522523	snp_synonymous	A	2650252	NZ_CP012004	NA	synonymous	breseq_29	T	67	T	ACT	67	3	ACC
29	P1_2c	2	12	P	4	ceftazidime	ACX60_RS12710	282	SNP	T:94:T	metal-dependent hydrolase	0.0652289	snp_synonymous	A	2653180	NZ_CP012004	NA	synonymous	breseq_29	T	94	T	ACA	94	3	ACT
29	P1_2c	2	12	P	4	ceftazidime	ACX60_RS12715	94	SNP	I:32:V	SDR family oxidoreductase	0.0648713	snp_nonsynonymous	G	2654014	NZ_CP012004	NA	nonsynonymous	breseq_29	V	32	I	GTT	32	1	ATT
29	P1_2c	2	12	P	4	ceftazidime	ACX60_RS12715	99	SNP	E:33:E	SDR family oxidoreductase	0.0701981	snp_synonymous	G	2654019	NZ_CP012004	NA	synonymous	breseq_29	E	33	E	GAG	33	3	GAA
29	P1_2c	2	12	P	4	ceftazidime	ACX60_RS12715	129	SNP	C:43:C	SDR family oxidoreductase	0.0576539	snp_synonymous	T	2654049	NZ_CP012004	NA	synonymous	breseq_29	C	43	C	TGT	43	3	TGC
29	P1_2c	2	12	P	4	ceftazidime	ACX60_RS12715	432	SNP	G:144:G	SDR family oxidoreductase	0.0730991	snp_synonymous	T	2654352	NZ_CP012004	NA	synonymous	breseq_29	G	144	G	GGT	144	3	GGC
29	P1_2c	2	12	P	4	ceftazidime	ACX60_RS12715	438	SNP	I:146:I	SDR family oxidoreductase	0.0708208	snp_synonymous	C	2654358	NZ_CP012004	NA	synonymous	breseq_29	I	146	I	ATC	146	3	ATT
29	P1_2c	2	12	P	4	ceftazidime	ACX60_RS12715	447	SNP	V:149:V	SDR family oxidoreductase	0.0658889	snp_synonymous	G	2654367	NZ_CP012004	NA	synonymous	breseq_29	V	149	V	GTG	149	3	GTA
29	P1_2c	2	12	P	4	ceftazidime	ACX60_RS12715	456	SNP	A:152:A	SDR family oxidoreductase	0.0844698	snp_synonymous	C	2654376	NZ_CP012004	NA	synonymous	breseq_29	A	152	A	GCC	152	3	GCG
29	P1_2c	2	12	P	4	ceftazidime	ACX60_RS12715	462	SNP	S:154:S	SDR family oxidoreductase	0.0781593	snp_synonymous	G	2654382	NZ_CP012004	NA	synonymous	breseq_29	S	154	S	TCG	154	3	TCT
29	P1_2c	2	12	P	4	ceftazidime	ACX60_RS12715	573	SNP	V:191:V	SDR family oxidoreductase	0.0715451	snp_synonymous	A	2654493	NZ_CP012004	NA	synonymous	breseq_29	V	191	V	GTA	191	3	GTG
29	P1_2c	2	12	P	4	ceftazidime	ACX60_RS12715	576	SNP	L:192:L	SDR family oxidoreductase	0.0740724	snp_synonymous	T	2654496	NZ_CP012004	NA	synonymous	breseq_29	L	192	L	CTT	192	3	CTC
29	P1_2c	2	12	P	4	ceftazidime	ACX60_RS12715	594	SNP	P:198:P	SDR family oxidoreductase	0.0778227	snp_synonymous	A	2654514	NZ_CP012004	NA	synonymous	breseq_29	P	198	P	CCA	198	3	CCT
29	P1_2c	2	12	P	4	ceftazidime	ACX60_RS12715	627	SNP	G:209:G	SDR family oxidoreductase	0.0634179	snp_synonymous	G	2654547	NZ_CP012004	NA	synonymous	breseq_29	G	209	G	GGG	209	3	GGC
29	P1_2c	2	12	P	4	ceftazidime	ACX60_RS12715	654	SNP	A:218:A	SDR family oxidoreductase	0.0583344	snp_synonymous	A	2654574	NZ_CP012004	NA	synonymous	breseq_29	A	218	A	GCA	218	3	GCG
29	P1_2c	2	12	P	4	ceftazidime	ACX60_RS19285/ACX60_RS15145	intergenic (-44/-11)	SNP	:NA:	hypothetical protein/MFS transporter	1	snp_intergenic	G	3199253	NZ_CP012004	NA	intergenic	breseq_29		NA			NA	NA
28	P1_1c	1	12	P	4	ceftazidime	ACX60_RS01945	107	SNP	K:36:T	shikimate dehydrogenase	0.094759	snp_nonsynonymous	G	411897	NZ_CP012004	NA	nonsynonymous	breseq_28	T	36	K	ACA	36	2	AAA
28	P1_1c	1	12	P	4	ceftazidime	ACX60_RS02390	coding (580-627/663 nt)	DEL	:NA:	hypothetical protein	1	small_indel		489844	NZ_CP012004	48		breseq_28		NA			NA	NA
28	P1_1c	1	12	P	4	ceftazidime	ACX60_RS02770	1299	SNP	S:433:S	copper oxidase	0.0566645	snp_synonymous	T	563384	NZ_CP012004	NA	synonymous	breseq_28	S	433	S	TCT	433	3	TCA
28	P1_1c	1	12	P	4	ceftazidime	ACX60_RS03830	3016	SNP	A:1006:S	AdeB/AdeJ family multidrug efflux RND transporter permease subunit	1	snp_nonsynonymous	A	793450	NZ_CP012004	NA	nonsynonymous	breseq_28	S	1006	A	TCC	1006	1	GCC
28	P1_1c	1	12	P	4	ceftazidime	ACX60_RS04430	242	SNP	S:81:L	DNA gyrase subunit A	1	snp_nonsynonymous	T	931336	NZ_CP012004	NA	nonsynonymous	breseq_28	L	81	S	TTA	81	2	TCA
28	P1_1c	1	12	P	4	ceftazidime	ACX60_RS09760	pseudogene (1640-1698/1866 nt)	AMP	:NA:	peptidylprolyl isomerase	0.154403	large_amplification		2067505	NZ_CP012004	59		breseq_28		NA			NA	NA
28	P1_1c	1	12	P	4	ceftazidime	ACX60_RS09760	pseudogene (370/1866 nt)	DEL	:NA:	peptidylprolyl isomerase	0.367582	small_indel		2068833	NZ_CP012004	1		breseq_28		NA			NA	NA
28	P1_1c	1	12	P	4	ceftazidime	ACX60_RS12760/ACX60_RS12765	intergenic (-213/-279)	DEL	:NA:	MFS transporter/(2Fe-2S)-binding protein	0.0644927	small_indel		2666432	NZ_CP012004	1		breseq_28		NA			NA	NA
28	P1_1c	1	12	P	4	ceftazidime	ACX60_RS12760/ACX60_RS12765	intergenic (-214/-278)	DEL	:NA:	MFS transporter/(2Fe-2S)-binding protein	0.0644875	small_indel		2666433	NZ_CP012004	1		breseq_28		NA			NA	NA
28	P1_1c	1	12	P	4	ceftazidime	ACX60_RS19285/ACX60_RS15145	intergenic (-44/-11)	SNP	:NA:	hypothetical protein/MFS transporter	1	snp_intergenic	G	3199253	NZ_CP012004	NA	intergenic	breseq_28		NA			NA	NA
27	B3_3c	3	12	B	4	ceftazidime	ACX60_RS02390	coding(537544/663nt)	DEL	:NA:	hypothetical protein	1	small_indel		489801	NZ_CP012004	8		breseq_21(newrun)		NA			NA	NA
27	B3_3c	3	12	B	4	ceftazidime	ACX60_RS02405		SNP	G:288:S	AdeB/AdeJ family multidrug efflux RND transporter permease subunit	1	snp_nonsynonymous	A	795604	NZ_CP012004	NA	nonsynonymous	breseq_21(newrun)	S	NA	G	AGT	NA	NA	GGT
26	B3_2c	2	12	B	4	ceftazidime	ACX60_RS02305	1488	SNP	G:496:G	hypothetical protein	0.0787501	snp_synonymous	G	472053	NZ_CP012004	NA	synonymous	breseq_26	G	496	G	GGC	496	3	GGT
26	B3_2c	2	12	B	4	ceftazidime	ACX60_RS02305	1485	SNP	G:495:G	hypothetical protein	0.0906019	snp_synonymous	G	472056	NZ_CP012004	NA	synonymous	breseq_26	G	495	G	GGC	495	3	GGT
26	B3_2c	2	12	B	4	ceftazidime	ACX60_RS03415	99	SNP	K:33:N	hemolysin D	0.109242	snp_nonsynonymous	G	707881	NZ_CP012004	NA	nonsynonymous	breseq_26	N	33	K	AAC	33	3	AAA
26	B3_2c	2	12	B	4	ceftazidime	ACX60_RS03830	408	SNP	F:136:L	AdeB/AdeJ family multidrug efflux RND transporter permease subunit	1	snp_nonsynonymous	T	796058	NZ_CP012004	NA	nonsynonymous	breseq_26	L	136	F	TTA	136	3	TTC
26	B3_2c	2	12	B	4	ceftazidime	ACX60_RS14465	154	SNP	T:52:P	hypothetical protein	0.0582528	snp_nonsynonymous	G	3048963	NZ_CP012004	NA	nonsynonymous	breseq_26	P	52	T	CCC	52	1	ACC
26	B3_2c	2	12	B	4	ceftazidime	ACX60_RS14630	coding (520-528/1650 nt)	DEL	:NA:	two-component sensor histidine kinase	1	small_indel		3083584	NZ_CP012004	9		breseq_26		NA			NA	NA
25	B3_1c	1	12	B	4	ceftazidime	ACX60_RS02305	1470	SNP	V:490:V	hypothetical protein	0.08535	snp_synonymous	A	472071	NZ_CP012004	NA	synonymous	breseq_25	V	490	V	GTT	490	3	GTG
25	B3_1c	1	12	B	4	ceftazidime	ACX60_RS02425	1067	SNP	*:356:L	hypothetical protein	0.0779042	snp_nonsynonymous	T	495717	NZ_CP012004	NA	nonsynonymous	breseq_25	L	356	*	TTA	356	2	TGA
25	B3_1c	1	12	B	4	ceftazidime	ACX60_RS03830	862	SNP	G:288:S	AdeB/AdeJ family multidrug efflux RND transporter permease subunit	1	snp_nonsynonymous	T	795604	NZ_CP012004	NA	nonsynonymous	breseq_25	S	288	G	AGT	288	1	GGT
25	B3_1c	1	12	B	4	ceftazidime	ACX60_RS06025	1022	SNP	L:341:R	LysR family transcriptional regulator	1	snp_nonsynonymous	G	1304900	NZ_CP012004	NA	nonsynonymous	breseq_25	R	341	L	CGC	341	2	CTC
25	B3_1c	1	12	B	4	ceftazidime	ACX60_RS16405	coding (24-37/402 nt)	DEL	:NA:	ribosome-binding factor A	1	small_indel		3479572	NZ_CP012004	14		breseq_25		NA			NA	NA
24	B2_3c	3	12	B	4	ceftazidime	ACX60_RS02305	1503	SNP	I:501:I	hypothetical protein	0.0508013	snp_synonymous	G	472038	NZ_CP012004	NA	synonymous	breseq_24	I	501	I	ATC	501	3	ATT
24	B2_3c	3	12	B	4	ceftazidime	ACX60_RS02305	1309	SNP	I:437:V	hypothetical protein	0.0967498	snp_nonsynonymous	C	472232	NZ_CP012004	NA	nonsynonymous	breseq_24	V	437	I	GTT	437	1	ATT
24	B2_3c	3	12	B	4	ceftazidime	ACX60_RS02390	coding (316-329/663 nt)	DEL	:NA:	hypothetical protein	1	small_indel		489580	NZ_CP012004	14		breseq_24		NA			NA	NA
24	B2_3c	3	12	B	4	ceftazidime	ACX60_RS02425	1067	SNP	*:356:L	hypothetical protein	0.0820651	snp_nonsynonymous	T	495717	NZ_CP012004	NA	nonsynonymous	breseq_24	L	356	*	TTA	356	2	TGA
24	B2_3c	3	12	B	4	ceftazidime	ACX60_RS02980	217	SNP	L:73:V	bifunctional glutamine synthetase adenylyltransferase/deadenyltransferase	0.0575657	snp_nonsynonymous	G	609790	NZ_CP012004	NA	nonsynonymous	breseq_24	V	73	L	GTA	73	1	TTA
24	B2_3c	3	12	B	4	ceftazidime	ACX60_RS03765/ACX60_RS03770	intergenic (-97/+56)	SNP	:NA:	hypothetical protein/ammonium transporter	0.0623751	snp_intergenic	A	780486	NZ_CP012004	NA	intergenic	breseq_24		NA			NA	NA
24	B2_3c	3	12	B	4	ceftazidime	ACX60_RS03830	868	SNP	A:290:T	AdeB/AdeJ family multidrug efflux RND transporter permease subunit	1	snp_nonsynonymous	T	795598	NZ_CP012004	NA	nonsynonymous	breseq_24	T	290	A	ACA	290	1	GCA
23	B2_2c	2	12	B	4	ceftazidime	ACX60_RS00895	coding (671/981 nt)	INS	:NA:	transporter	0.0983556	small_indel	CAT	193553	NZ_CP012004	NA		breseq_23		NA			NA	NA
23	B2_2c	2	12	B	4	ceftazidime	ACX60_RS02305	1503	SNP	I:501:I	hypothetical protein	0.0771632	snp_synonymous	G	472038	NZ_CP012004	NA	synonymous	breseq_23	I	501	I	ATC	501	3	ATT
23	B2_2c	2	12	B	4	ceftazidime	ACX60_RS02305	1309	SNP	I:437:V	hypothetical protein	0.0940981	snp_nonsynonymous	C	472232	NZ_CP012004	NA	nonsynonymous	breseq_23	V	437	I	GTT	437	1	ATT
23	B2_2c	2	12	B	4	ceftazidime	ACX60_RS02390	25	SNP	Q:9:*	hypothetical protein	0.397958	snp_nonsense	T	489289	NZ_CP012004	NA	nonsense	breseq_23	*	9	Q	TAA	9	1	CAA
23	B2_2c	2	12	B	4	ceftazidime	ACX60_RS02390	385	SNP	R:129:C	hypothetical protein	0.257	snp_nonsynonymous	T	489649	NZ_CP012004	NA	nonsynonymous	breseq_23	C	129	R	TGT	129	1	CGT
23	B2_2c	2	12	B	4	ceftazidime	ACX60_RS02390	coding (447/663 nt)	INS	:NA:	hypothetical protein	0.0571427	small_indel	T	489711	NZ_CP012004	NA		breseq_23		NA			NA	NA
23	B2_2c	2	12	B	4	ceftazidime	ACX60_RS02390	coding (504/663 nt)	INS	:NA:	hypothetical protein	0.181868	small_indel	ATCCGAGCTTA	489768	NZ_CP012004	NA		breseq_23		NA			NA	NA
23	B2_2c	2	12	B	4	ceftazidime	ACX60_RS06660	coding (37/1881 nt)	INS	:NA:	tRNA uridine-5-carboxymethylaminomethyl(34) synthesis enzyme MnmG	0.0557387	small_indel	TTATCG	1426038	NZ_CP012004	NA		breseq_23		NA			NA	NA
23	B2_2c	2	12	B	4	ceftazidime	ACX60_RS07895	385	SNP	Q:129:*	TetR family transcriptional regulator	0.0614996	snp_nonsense	A	1678562	NZ_CP012004	NA	nonsense	breseq_23	*	129	Q	TAA	129	1	CAA
23	B2_2c	2	12	B	4	ceftazidime	ACX60_RS07895	291	SNP	L:97:L	TetR family transcriptional regulator	0.159055	snp_synonymous	C	1678656	NZ_CP012004	NA	synonymous	breseq_23	L	97	L	TTG	97	3	TTA
23	B2_2c	2	12	B	4	ceftazidime	ACX60_RS07895	43	SNP	K:15:*	TetR family transcriptional regulator	0.688458	snp_nonsense	A	1678904	NZ_CP012004	NA	nonsense	breseq_23	*	15	K	TAA	15	1	AAA
23	B2_2c	2	12	B	4	ceftazidime	ACX60_RS14465	156	SNP	T:52:T	hypothetical protein	0.0835938	snp_synonymous	T	3048961	NZ_CP012004	NA	synonymous	breseq_23	T	52	T	ACA	52	3	ACC
22	B2_1c	1	12	B	4	ceftazidime	ACX60_RS03830	526	SNP	Q:176:K	AdeB/AdeJ family multidrug efflux RND transporter permease subunit	1	snp_nonsynonymous	T	795940	NZ_CP012004	NA	nonsynonymous	breseq_22	K	176	Q	AAG	176	1	CAG
22	B2_1c	1	12	B	4	ceftazidime	ACX60_RS07895	43	SNP	K:15:*	TetR family transcriptional regulator	1	snp_nonsense	A	1678904	NZ_CP012004	NA	nonsense	breseq_22	*	15	K	TAA	15	1	AAA
22	B2_1c	1	12	B	4	ceftazidime	ACX60_RS13425	1332	SNP	A:444:A	RNA degradosome polyphosphate kinase	0.0507298	snp_synonymous	A	2824280	NZ_CP012004	NA	synonymous	breseq_22	A	444	A	GCT	444	3	GCC
22	B2_1c	1	12	B	4	ceftazidime	ACX60_RS13425	1329	SNP	H:443:H	RNA degradosome polyphosphate kinase	0.0516148	snp_synonymous	G	2824283	NZ_CP012004	NA	synonymous	breseq_22	H	443	H	CAC	443	3	CAT
22	B2_1c	1	12	B	4	ceftazidime	ACX60_RS13425	1326	SNP	T:442:T	RNA degradosome polyphosphate kinase	0.0513825	snp_synonymous	A	2824286	NZ_CP012004	NA	synonymous	breseq_22	T	442	T	ACT	442	3	ACC
22	B2_1c	1	12	B	4	ceftazidime	[ACX60_RS19275]	NA	DEL	:NA:	[ACX60_RS19275]	1	large_deletion		3150230	NZ_CP012004	153		breseq_22		NA			NA	NA
21	B1_3c	3	12	B	4	ceftazidime	ACX60_RS03765/ACX60_RS03770	intergenic (-97/+56)	SNP	:NA:	hypothetical protein/ammonium transporter	0.0821204	snp_intergenic	A	780486	NZ_CP012004	NA	intergenic	breseq_21		NA			NA	NA
21	B1_3c	3	12	B	4	ceftazidime	ACX60_RS03830	527	SNP	Q:176:R	AdeB/AdeJ family multidrug efflux RND transporter permease subunit	1	snp_nonsynonymous	C	795939	NZ_CP012004	NA	nonsynonymous	breseq_21	R	176	Q	CGG	176	2	CAG
21	B1_3c	3	12	B	4	ceftazidime	ACX60_RS05355	coding (82/963 nt)	DEL	:NA:	protease SohB	1	small_indel		1142085	NZ_CP012004	1		breseq_21		NA			NA	NA
21	B1_3c	3	12	B	4	ceftazidime	ACX60_RS06025	coding (251-262/1032 nt)	DEL	:NA:	LysR family transcriptional regulator	1	small_indel		1304129	NZ_CP012004	12		breseq_21		NA			NA	NA
21	B1_3c	3	12	B	4	ceftazidime	ACX60_RS06660	coding (37/1881 nt)	INS	:NA:	tRNA uridine-5-carboxymethylaminomethyl(34) synthesis enzyme MnmG	0.742077	small_indel	TTATCG	1426038	NZ_CP012004	NA		breseq_21		NA			NA	NA
21	B1_3c	3	12	B	4	ceftazidime	ACX60_RS07895	530	SNP	G:177:V	TetR family transcriptional regulator	1	snp_nonsynonymous	A	1678417	NZ_CP012004	NA	nonsynonymous	breseq_21	V	177	G	GTA	177	2	GGA
21	B1_3c	3	12	B	4	ceftazidime	ACX60_RS08580	71	SNP	Y:24:C	3-oxoadipate CoA-transferase subunit B	0.0539775	snp_nonsynonymous	C	1823449	NZ_CP012004	NA	nonsynonymous	breseq_21	C	24	Y	TGT	24	2	TAT
21	B1_3c	3	12	B	4	ceftazidime	ACX60_RS13425	1332	SNP	A:444:A	RNA degradosome polyphosphate kinase	0.0522757	snp_synonymous	A	2824280	NZ_CP012004	NA	synonymous	breseq_21	A	444	A	GCT	444	3	GCC
21	B1_3c	3	12	B	4	ceftazidime	ACX60_RS13425	1329	SNP	H:443:H	RNA degradosome polyphosphate kinase	0.0546122	snp_synonymous	G	2824283	NZ_CP012004	NA	synonymous	breseq_21	H	443	H	CAC	443	3	CAT
21	B1_3c	3	12	B	4	ceftazidime	ACX60_RS13425	1326	SNP	T:442:T	RNA degradosome polyphosphate kinase	0.0549121	snp_synonymous	A	2824286	NZ_CP012004	NA	synonymous	breseq_21	T	442	T	ACT	442	3	ACC
21	B1_3c	3	12	B	4	ceftazidime	ACX60_RS13830	999	SNP	K:333:N	gamma-glutamyltransferase	0.0673399	snp_nonsynonymous	G	2918393	NZ_CP012004	NA	nonsynonymous	breseq_21	N	333	K	AAC	333	3	AAA
21	B1_3c	3	12	B	4	ceftazidime	ACX60_RS14465	154	SNP	T:52:P	hypothetical protein	0.0852942	snp_nonsynonymous	G	3048963	NZ_CP012004	NA	nonsynonymous	breseq_21	P	52	T	CCC	52	1	ACC
21	B1_3c	3	12	B	4	ceftazidime	ACX60_RS14630	994	SNP	R:332:G	two-component sensor histidine kinase	0.0697598	snp_nonsynonymous	C	3083118	NZ_CP012004	NA	nonsynonymous	breseq_21	G	332	R	GGT	332	1	CGT
20	B1_2c	2	12	B	4	ceftazidime	ACX60_RS02305	1419	SNP	I:473:I	hypothetical protein	0.141241	snp_synonymous	T	472122	NZ_CP012004	NA	synonymous	breseq_20	I	473	I	ATA	473	3	ATC
20	B1_2c	2	12	B	4	ceftazidime	ACX60_RS02425	1067	SNP	*:356:L	hypothetical protein	0.119724	snp_nonsynonymous	T	495717	NZ_CP012004	NA	nonsynonymous	breseq_20	L	356	*	TTA	356	2	TGA
20	B1_2c	2	12	B	4	ceftazidime	ACX60_RS03830	coding (541-543/3177 nt)	DEL	:NA:	AdeB/AdeJ family multidrug efflux RND transporter permease subunit	0.877322	small_indel		795923	NZ_CP012004	3		breseq_20		NA			NA	NA
20	B1_2c	2	12	B	4	ceftazidime	ACX60_RS03830	518	SNP	G:173:V	AdeB/AdeJ family multidrug efflux RND transporter permease subunit	0.0569124	snp_nonsynonymous	A	795948	NZ_CP012004	NA	nonsynonymous	breseq_20	V	173	G	GTT	173	2	GGT
20	B1_2c	2	12	B	4	ceftazidime	ACX60_RS05355	coding (82/963 nt)	DEL	:NA:	protease SohB	1	small_indel		1142085	NZ_CP012004	1		breseq_20		NA			NA	NA
20	B1_2c	2	12	B	4	ceftazidime	ACX60_RS06015	coding (372/3180 nt)	INS	:NA:	multidrug efflux RND transporter permease subunit	0.0707698	small_indel	A	1302086	NZ_CP012004	NA		breseq_20		NA			NA	NA
20	B1_2c	2	12	B	4	ceftazidime	ACX60_RS06015	coding (372/3180 nt)	INS	:NA:	multidrug efflux RND transporter permease subunit	0.0707693	small_indel	C	1302086	NZ_CP012004	NA		breseq_20		NA			NA	NA
20	B1_2c	2	12	B	4	ceftazidime	ACX60_RS06025	coding (251-262/1032 nt)	DEL	:NA:	LysR family transcriptional regulator	1	small_indel		1304129	NZ_CP012004	12		breseq_20		NA			NA	NA
20	B1_2c	2	12	B	4	ceftazidime	ACX60_RS06025	coding (560/1032 nt)	INS	:NA:	LysR family transcriptional regulator	1	small_indel	AA	1304438	NZ_CP012004	NA		breseq_20		NA			NA	NA
20	B1_2c	2	12	B	4	ceftazidime	ACX60_RS07895	530	SNP	G:177:V	TetR family transcriptional regulator	1	snp_nonsynonymous	A	1678417	NZ_CP012004	NA	nonsynonymous	breseq_20	V	177	G	GTA	177	2	GGA
20	B1_2c	2	12	B	4	ceftazidime	ACX60_RS14630	coding (611-619/1650 nt)	DEL	:NA:	two-component sensor histidine kinase	0.084507	small_indel		3083493	NZ_CP012004	9		breseq_20		NA			NA	NA
19	B1_1c	1	12	B	4	ceftazidime	ACX60_RS03830		SNP	I:383:F	AdeB/AdeJ family multidrug efflux RND transporter permease subunit	1	snp_nonsynonymous	A	795,319	NZ_CP012004	NA	nonsynonymous	breseq_55(newrun)	F	383	I
19	B1_1c	1	12	B	4	ceftazidime	ACX60_RS05355	coding (75/963 nt)	SNP	:NA:	protease SohB	1	small_indel		1,142,078	NZ_CP012004	1		breseq_55(newrun)		NA
19	B1_1c	1	12	B	4	ceftazidime	ACX60_RS06025	coding (251‑262/1032 nt)	SNP	:NA:	LysR family transcriptional regulator	1	small_indel		1,304,129	NZ_CP012004	12		breseq_55(newrun)		NA
19	B1_1c	1	12	B	4	ceftazidime	ACX60_RS07895		SNP	G:177:V	TetR family transcriptional regulator	1	snp_nonsynonymous	A	1,678,417	NZ_CP012004	NA	nonsense	breseq_55(newrun)	V	177	G
18	P3_3i	3	12	P	4	imipenem	ACX60_RS01490	1736	SNP	A:579:V	peptide ABC transporter permease	1	snp_nonsynonymous	T	311432	NZ_CP012004	NA	nonsynonymous	breseq_18	V	579	A	GTT	579	2	GCT
18	P3_3i	3	12	P	4	imipenem	ACX60_RS04430	242	SNP	S:81:L	DNA gyrase subunit A	1	snp_nonsynonymous	T	931336	NZ_CP012004	NA	nonsynonymous	breseq_18	L	81	S	TTA	81	2	TCA
18	P3_3i	3	12	P	4	imipenem	ACX60_RS05015/ACX60_RS05020	intergenic (+103/-262)	SNP	:NA:	S-(hydroxymethyl)glutathione synthase/chaperone protein	0.0783091	snp_intergenic	G	1059027	NZ_CP012004	NA	intergenic	breseq_18		NA			NA	NA
18	P3_3i	3	12	P	4	imipenem	ACX60_RS09370/ACX60_RS09375	intergenic (-83/-110)	SNP	:NA:	Zn-dependent hydrolase/Fis family transcriptional regulator	0.0614581	snp_intergenic	T	1986492	NZ_CP012004	NA	intergenic	breseq_18		NA			NA	NA
18	P3_3i	3	12	P	4	imipenem	ACX60_RS17100	251	SNP	S:84:L	DNA topoisomerase IV subunit A	1	snp_nonsynonymous	A	3626451	NZ_CP012004	NA	nonsynonymous	breseq_18	L	84	S	TTG	84	2	TCG
17	P3_2i	2	12	P	4	imipenem	ACX60_RS01490	1732	SNP	A:578:T	peptide ABC transporter permease	1	snp_nonsynonymous	A	311428	NZ_CP012004	NA	nonsynonymous	breseq_17	T	578	A	ACC	578	1	GCC
17	P3_2i	2	12	P	4	imipenem	ACX60_RS04430	242	SNP	S:81:L	DNA gyrase subunit A	1	snp_nonsynonymous	T	931336	NZ_CP012004	NA	nonsynonymous	breseq_17	L	81	S	TTA	81	2	TCA
17	P3_2i	2	12	P	4	imipenem	ACX60_RS05355	coding (218/963 nt)	INS	:NA:	protease SohB	0.40797	small_indel	T	1142221	NZ_CP012004	NA		breseq_17		NA			NA	NA
17	P3_2i	2	12	P	4	imipenem	ACX60_RS05355	coding (218/963 nt)	INS	:NA:	protease SohB	0.407965	small_indel	G	1142221	NZ_CP012004	NA		breseq_17		NA			NA	NA
17	P3_2i	2	12	P	4	imipenem	ACX60_RS17100	251	SNP	S:84:L	DNA topoisomerase IV subunit A	1	snp_nonsynonymous	A	3626451	NZ_CP012004	NA	nonsynonymous	breseq_17	L	84	S	TTG	84	2	TCG
16	P3_1i	1	12	P	4	imipenem	ACX60_RS01490	1183	SNP	S:395:P	peptide ABC transporter permease	1	snp_nonsynonymous	C	310879	NZ_CP012004	NA	nonsynonymous	breseq_16	P	395	S	CCT	395	1	TCT
16	P3_1i	1	12	P	4	imipenem	ACX60_RS02425	1067	SNP	*:356:L	hypothetical protein	0.0850925	snp_nonsynonymous	T	495717	NZ_CP012004	NA	nonsynonymous	breseq_16	L	356	*	TTA	356	2	TGA
16	P3_1i	1	12	P	4	imipenem	ACX60_RS04430	242	SNP	S:81:L	DNA gyrase subunit A	1	snp_nonsynonymous	T	931336	NZ_CP012004	NA	nonsynonymous	breseq_16	L	81	S	TTA	81	2	TCA
16	P3_1i	1	12	P	4	imipenem	ACX60_RS06395	1290	SNP	E:430:D	amino acid ABC transporter permease	0.0684228	snp_nonsynonymous	C	1376280	NZ_CP012004	NA	nonsynonymous	breseq_16	D	430	E	GAC	430	3	GAA
16	P3_1i	1	12	P	4	imipenem	ACX60_RS14465	154	SNP	T:52:P	hypothetical protein	0.0651035	snp_nonsynonymous	G	3048963	NZ_CP012004	NA	nonsynonymous	breseq_16	P	52	T	CCC	52	1	ACC
16	P3_1i	1	12	P	4	imipenem	ACX60_RS17100	251	SNP	S:84:L	DNA topoisomerase IV subunit A	1	snp_nonsynonymous	A	3626451	NZ_CP012004	NA	nonsynonymous	breseq_16	L	84	S	TTG	84	2	TCG
15	P2_3i	3	12	P	4	imipenem	ACX60_RS01490	1735	SNP	A:579:T	peptide ABC transporter permease	0.146741	snp_nonsynonymous	A	311431	NZ_CP012004	NA	nonsynonymous	breseq_15	T	579	A	ACT	579	1	GCT
15	P2_3i	3	12	P	4	imipenem	ACX60_RS01490	1738	SNP	P:580:A	peptide ABC transporter permease	0.850344	snp_nonsynonymous	G	311434	NZ_CP012004	NA	nonsynonymous	breseq_15	A	580	P	GCA	580	1	CCA
15	P2_3i	3	12	P	4	imipenem	ACX60_RS03415	95	SNP	P:32:Q	hemolysin D	0.107538	snp_nonsynonymous	T	707885	NZ_CP012004	NA	nonsynonymous	breseq_15	Q	32	P	CAA	32	2	CCA
15	P2_3i	3	12	P	4	imipenem	ACX60_RS03765/ACX60_RS03770	intergenic (-112/+41)	SNP	:NA:	hypothetical protein/ammonium transporter	0.0598016	snp_intergenic	C	780501	NZ_CP012004	NA	intergenic	breseq_15		NA			NA	NA
15	P2_3i	3	12	P	4	imipenem	ACX60_RS03840	421	SNP	H:141:Y	phosphatidylglycerophosphatase	1	snp_nonsynonymous	A	797959	NZ_CP012004	NA	nonsynonymous	breseq_15	Y	141	H	TAT	141	1	CAT
15	P2_3i	3	12	P	4	imipenem	ACX60_RS04430	242	SNP	S:81:L	DNA gyrase subunit A	1	snp_nonsynonymous	T	931336	NZ_CP012004	NA	nonsynonymous	breseq_15	L	81	S	TTA	81	2	TCA
15	P2_3i	3	12	P	4	imipenem	ACX60_RS06950	501	SNP	R:167:R	LysR family transcriptional regulator	0.0845828	snp_synonymous	G	1497631	NZ_CP012004	NA	synonymous	breseq_15	R	167	R	CGG	167	3	CGT
15	P2_3i	3	12	P	4	imipenem	ACX60_RS17760	364	SNP	A:122:T	UDP-galactose phosphate transferase	0.226593	snp_nonsynonymous	T	3771327	NZ_CP012004	NA	nonsynonymous	breseq_15	T	122	A	ACT	122	1	GCT
15	P2_3i	3	12	P	4	imipenem	ACX60_RS17760	251	SNP	S:84:*	UDP-galactose phosphate transferase	0.199102	snp_nonsense	T	3771440	NZ_CP012004	NA	nonsense	breseq_15	*	84	S	TAA	84	2	TCA
14	P2_2i	2	12	P	4	imipenem	ACX60_RS00600	coding (85-87/183 nt)	DEL	:NA:	hypothetical protein	0.0501959	small_indel		131198	NZ_CP012004	3		breseq_14		NA			NA	NA
14	P2_2i	2	12	P	4	imipenem	ACX60_RS01490	1736	SNP	A:579:V	peptide ABC transporter permease	1	snp_nonsynonymous	T	311432	NZ_CP012004	NA	nonsynonymous	breseq_14	V	579	A	GTT	579	2	GCT
14	P2_2i	2	12	P	4	imipenem	ACX60_RS03840	421	SNP	H:141:Y	phosphatidylglycerophosphatase	1	snp_nonsynonymous	A	797959	NZ_CP012004	NA	nonsynonymous	breseq_14	Y	141	H	TAT	141	1	CAT
14	P2_2i	2	12	P	4	imipenem	ACX60_RS04430	242	SNP	S:81:L	DNA gyrase subunit A	1	snp_nonsynonymous	T	931336	NZ_CP012004	NA	nonsynonymous	breseq_14	L	81	S	TTA	81	2	TCA
14	P2_2i	2	12	P	4	imipenem	ACX60_RS14930	71	SNP	K:24:T	hypothetical protein	0.0536575	snp_nonsynonymous	G	3154213	NZ_CP012004	NA	nonsynonymous	breseq_14	T	24	K	ACG	24	2	AAG
14	P2_2i	2	12	P	4	imipenem	ACX60_RS17760	247	SNP	R:83:C	UDP-galactose phosphate transferase	0.103007	snp_nonsynonymous	A	3771444	NZ_CP012004	NA	nonsynonymous	breseq_14	C	83	R	TGT	83	1	CGT
13	P2_1i	1	12	P	4	imipenem	A1S_3470/â€“	intergenic (-245/â€“)	INS	:NA:	regulatory protein LysR/â€“	0.221252	small_indel	TGCACTTAAT	12689	NC_009083	NA		breseq_13		NA			NA	NA
13	P2_1i	1	12	P	4	imipenem	ACX60_RS01490	1183	SNP	S:395:P	peptide ABC transporter permease	1	snp_nonsynonymous	C	310879	NZ_CP012004	NA	nonsynonymous	breseq_13	P	395	S	CCT	395	1	TCT
13	P2_1i	1	12	P	4	imipenem	ACX60_RS02770	1299	SNP	S:433:S	copper oxidase	0.0591807	snp_synonymous	T	563384	NZ_CP012004	NA	synonymous	breseq_13	S	433	S	TCT	433	3	TCA
13	P2_1i	1	12	P	4	imipenem	ACX60_RS03840	421	SNP	H:141:Y	phosphatidylglycerophosphatase	1	snp_nonsynonymous	A	797959	NZ_CP012004	NA	nonsynonymous	breseq_13	Y	141	H	TAT	141	1	CAT
13	P2_1i	1	12	P	4	imipenem	ACX60_RS04430	242	SNP	S:81:L	DNA gyrase subunit A	1	snp_nonsynonymous	T	931336	NZ_CP012004	NA	nonsynonymous	breseq_13	L	81	S	TTA	81	2	TCA
13	P2_1i	1	12	P	4	imipenem	ACX60_RS16095	coding (3294/3333 nt)	INS	:NA:	ribonuclease E/G	0.433205	small_indel	CGCCCTCGT	3408837	NZ_CP012004	NA		breseq_13		NA			NA	NA
12	P1_3i	3	12	P	4	imipenem	ACX60_RS01490	1736	SNP	A:579:V	peptide ABC transporter permease	1	snp_nonsynonymous	T	311432	NZ_CP012004	NA	nonsynonymous	breseq_12	V	579	A	GTT	579	2	GCT
12	P1_3i	3	12	P	4	imipenem	ACX60_RS04430	242	SNP	S:81:L	DNA gyrase subunit A	1	snp_nonsynonymous	T	931336	NZ_CP012004	NA	nonsynonymous	breseq_12	L	81	S	TTA	81	2	TCA
12	P1_3i	3	12	P	4	imipenem	ACX60_RS19285/ACX60_RS15145	intergenic (-44/-11)	SNP	:NA:	hypothetical protein/MFS transporter	1	snp_intergenic	G	3199253	NZ_CP012004	NA	intergenic	breseq_12		NA			NA	NA
11	P1_2i	2	12	P	4	imipenem	ACX60_RS01490	1748	SNP	A:583:D	peptide ABC transporter permease	1	snp_nonsynonymous	A	311444	NZ_CP012004	NA	nonsynonymous	breseq_11	D	583	A	GAT	583	2	GCT
11	P1_2i	2	12	P	4	imipenem	ACX60_RS04430	242	SNP	S:81:L	DNA gyrase subunit A	1	snp_nonsynonymous	T	931336	NZ_CP012004	NA	nonsynonymous	breseq_11	L	81	S	TTA	81	2	TCA
11	P1_2i	2	12	P	4	imipenem	ACX60_RS19285/ACX60_RS15145	intergenic (-44/-11)	SNP	:NA:	hypothetical protein/MFS transporter	1	snp_intergenic	G	3199253	NZ_CP012004	NA	intergenic	breseq_11		NA			NA	NA
10	P1_1i	1	12	P	4	imipenem	ACX60_RS01490	1588	SNP	H:530:Y	peptide ABC transporter permease	1	snp_nonsynonymous	T	311284	NZ_CP012004	NA	nonsynonymous	breseq_10	Y	530	H	TAT	530	1	CAT
10	P1_1i	1	12	P	4	imipenem	ACX60_RS02390	coding (320/663 nt)	DEL	:NA:	hypothetical protein	0.724294	small_indel		489584	NZ_CP012004	1		breseq_10		NA			NA	NA
10	P1_1i	1	12	P	4	imipenem	ACX60_RS02770	1299	SNP	S:433:S	copper oxidase	0.0513897	snp_synonymous	T	563384	NZ_CP012004	NA	synonymous	breseq_10	S	433	S	TCT	433	3	TCA
10	P1_1i	1	12	P	4	imipenem	ACX60_RS03415	95	SNP	P:32:Q	hemolysin D	0.0929012	snp_nonsynonymous	T	707885	NZ_CP012004	NA	nonsynonymous	breseq_10	Q	32	P	CAA	32	2	CCA
10	P1_1i	1	12	P	4	imipenem	ACX60_RS04430	242	SNP	S:81:L	DNA gyrase subunit A	1	snp_nonsynonymous	T	931336	NZ_CP012004	NA	nonsynonymous	breseq_10	L	81	S	TTA	81	2	TCA
10	P1_1i	1	12	P	4	imipenem	ACX60_RS19285/ACX60_RS15145	intergenic (-44/-11)	SNP	:NA:	hypothetical protein/MFS transporter	1	snp_intergenic	G	3199253	NZ_CP012004	NA	intergenic	breseq_10		NA			NA	NA
10	P1_1i	1	12	P	4	imipenem	ACX60_RS17060	24	SNP	K:8:N	class II aldolase	0.0737586	snp_nonsynonymous	C	3616106	NZ_CP012004	NA	nonsynonymous	breseq_10	N	8	K	AAC	8	3	AAA
10	P1_1i	1	12	P	4	imipenem	ACX60_RS18660	507	SNP	Q:169:Q	conjugal transfer protein TrbJ	0.0517101	snp_synonymous	A	86174	NZ_CP012005	NA	synonymous	breseq_10	Q	169	Q	CAA	169	3	CAG
9	B3_3i	3	12	B	4	imipenem	ACX60_RS01490	1570	SNP	G:524:S	peptide ABC transporter permease	1	snp_nonsynonymous	A	311266	NZ_CP012004	NA	nonsynonymous	breseq_9	S	524	G	AGT	524	1	GGT
9	B3_3i	3	12	B	4	imipenem	ACX60_RS02305	1470	SNP	V:490:V	hypothetical protein	0.106097	snp_synonymous	T	472071	NZ_CP012004	NA	synonymous	breseq_9	V	490	V	GTA	490	3	GTG
8	B3_2i	2	12	B	4	imipenem	ACX60_RS01490	1720	SNP	G:574:S	peptide ABC transporter permease	1	snp_nonsynonymous	A	311416	NZ_CP012004	NA	nonsynonymous	breseq_8	S	574	G	AGT	574	1	GGT
8	B3_2i	2	12	B	4	imipenem	ACX60_RS05150	132	SNP	Q:44:H	deoxyribodipyrimidine photo-lyase	0.0509515	snp_nonsynonymous	G	1091638	NZ_CP012004	NA	nonsynonymous	breseq_8	H	44	Q	CAC	44	3	CAA
8	B3_2i	2	12	B	4	imipenem	ACX60_RS12655	101	SNP	L:34:*	ribonuclease HII	0.060225	snp_nonsense	T	2642276	NZ_CP012004	NA	nonsense	breseq_8	*	34	L	TAA	34	2	TTA
7	B3_1i	1	12	B	4	imipenem	ACX60_RS00600	coding (85-87/183 nt)	DEL	:NA:	hypothetical protein	0.0525696	small_indel	NA	131198	NZ_CP012004	3		breseq_7		NA			NA	NA
7	B3_1i	1	12	B	4	imipenem	ACX60_RS01490	1748	SNP	A:583:V	peptide ABC transporter permease	1	snp_nonsynonymous	TRUE	311444	NZ_CP012004	NA	nonsynonymous	breseq_7	V	583	A	GTT	583	2	GCT
7	B3_1i	1	12	B	4	imipenem	ACX60_RS02390	coding (351-359/663 nt)	DEL	:NA:	hypothetical protein	1	small_indel	NA	489615	NZ_CP012004	9		breseq_7		NA			NA	NA
6	B2_3i	3	12	B	4	imipenem	ACX60_RS00715	640	SNP	E:214:*	GGDEF domain-containing protein	0.0934854	snp_nonsense	A	153135	NZ_CP012004	NA	nonsense	breseq_6	*	214	E	TAA	214	1	GAA
6	B2_3i	3	12	B	4	imipenem	ACX60_RS01490	1735	SNP	A:579:T	peptide ABC transporter permease	1	snp_nonsynonymous	A	311431	NZ_CP012004	NA	nonsynonymous	breseq_6	T	579	A	ACT	579	1	GCT
6	B2_3i	3	12	B	4	imipenem	ACX60_RS01970	1548	SNP	P:516:P	DEAD/DEAH box helicase	0.168344	snp_synonymous	T	418975	NZ_CP012004	NA	synonymous	breseq_6	P	516	P	CCT	516	3	CCG
6	B2_3i	3	12	B	4	imipenem	ACX60_RS02305	1503	SNP	I:501:I	hypothetical protein	0.0768385	snp_synonymous	G	472038	NZ_CP012004	NA	synonymous	breseq_6	I	501	I	ATC	501	3	ATT
6	B2_3i	3	12	B	4	imipenem	ACX60_RS02305	1488	SNP	G:496:G	hypothetical protein	0.053237	snp_synonymous	G	472053	NZ_CP012004	NA	synonymous	breseq_6	G	496	G	GGC	496	3	GGT
6	B2_3i	3	12	B	4	imipenem	ACX60_RS02305	1485	SNP	G:495:G	hypothetical protein	0.0621386	snp_synonymous	G	472056	NZ_CP012004	NA	synonymous	breseq_6	G	495	G	GGC	495	3	GGT
6	B2_3i	3	12	B	4	imipenem	ACX60_RS02660	601	SNP	T:201:P	hypothetical protein	0.0549765	snp_nonsynonymous	G	540530	NZ_CP012004	NA	nonsynonymous	breseq_6	P	201	T	CCA	201	1	ACA
6	B2_3i	3	12	B	4	imipenem	ACX60_RS02770	1288	SNP	D:430:Y	copper oxidase	0.0659313	snp_nonsynonymous	T	563373	NZ_CP012004	NA	nonsynonymous	breseq_6	Y	430	D	TAT	430	1	GAT
6	B2_3i	3	12	B	4	imipenem	ACX60_RS06020	coding (268/1218 nt)	DEL	:NA:	MexE family multidrug efflux RND transporter periplasmic adaptor subunit	0.173737	small_indel		1303414	NZ_CP012004	1		breseq_6		NA			NA	NA
6	B2_3i	3	12	B	4	imipenem	ACX60_RS06025	78	SNP	L:26:F	LysR family transcriptional regulator	0.067389	snp_nonsynonymous	T	1303956	NZ_CP012004	NA	nonsynonymous	breseq_6	F	26	L	TTT	26	3	TTG
6	B2_3i	3	12	B	4	imipenem	ACX60_RS06025	250	SNP	H:84:Y	LysR family transcriptional regulator	1	snp_nonsynonymous	T	1304128	NZ_CP012004	NA	nonsynonymous	breseq_6	Y	84	H	TAT	84	1	CAT
6	B2_3i	3	12	B	4	imipenem	ACX60_RS06025	671	SNP	N:224:I	LysR family transcriptional regulator	0.141766	snp_nonsynonymous	T	1304549	NZ_CP012004	NA	nonsynonymous	breseq_6	I	224	N	ATT	224	2	AAT
6	B2_3i	3	12	B	4	imipenem	ACX60_RS06025	coding (944/1032 nt)	INS	:NA:	LysR family transcriptional regulator	1	small_indel	TTGC	1304822	NZ_CP012004	NA		breseq_6		NA			NA	NA
6	B2_3i	3	12	B	4	imipenem	ACX60_RS06165	1332	SNP	Q:444:H	bifunctional prephenate dehydrogenase/3-phosphoshikimate 1-carboxyvinyltransferase	0.0617414	snp_nonsynonymous	C	1334328	NZ_CP012004	NA	nonsynonymous	breseq_6	H	444	Q	CAC	444	3	CAA
6	B2_3i	3	12	B	4	imipenem	ACX60_RS14630	725	SNP	A:242:V	two-component sensor histidine kinase	1	snp_nonsynonymous	A	3083387	NZ_CP012004	NA	nonsynonymous	breseq_6	V	242	A	GTG	242	2	GCG
5	B2_2i	2	12	B	4	imipenem	ACX60_RS00325	coding (360/1056 nt)	INS	:NA:	4-hydroxyphenylpyruvate dioxygenase	0.0751423	small_indel	GGT	70819	NZ_CP012004	NA		breseq_5		NA			NA	NA
5	B2_2i	2	12	B	4	imipenem	ACX60_RS01490	1570	SNP	G:524:C	peptide ABC transporter permease	1	snp_nonsynonymous	T	311266	NZ_CP012004	NA	nonsynonymous	breseq_5	C	524	G	TGT	524	1	GGT
5	B2_2i	2	12	B	4	imipenem	ACX60_RS02425	1067	SNP	*:356:L	hypothetical protein	0.138716	snp_nonsynonymous	T	495717	NZ_CP012004	NA	nonsynonymous	breseq_5	L	356	*	TTA	356	2	TGA
5	B2_2i	2	12	B	4	imipenem	ACX60_RS05355	coding (621/963 nt)	INS	:NA:	protease SohB	1	small_indel	AG	1142624	NZ_CP012004	NA		breseq_5		NA			NA	NA
5	B2_2i	2	12	B	4	imipenem	ACX60_RS06025	coding (251-262/1032 nt)	DEL	:NA:	LysR family transcriptional regulator	1	small_indel		1304129	NZ_CP012004	12		breseq_5		NA			NA	NA
5	B2_2i	2	12	B	4	imipenem	ACX60_RS13830	999	SNP	K:333:N	gamma-glutamyltransferase	0.0585933	snp_nonsynonymous	G	2918393	NZ_CP012004	NA	nonsynonymous	breseq_5	N	333	K	AAC	333	3	AAA
4	B2_1i	1	12	B	4	imipenem	ACX60_RS01490	1736	SNP	A:579:V	peptide ABC transporter permease	1	snp_nonsynonymous	T	311432	NZ_CP012004	NA	nonsynonymous	breseq_4	V	579	A	GTT	579	2	GCT
4	B2_1i	1	12	B	4	imipenem	ACX60_RS06025	250	SNP	H:84:Y	LysR family transcriptional regulator	1	snp_nonsynonymous	T	1304128	NZ_CP012004	NA	nonsynonymous	breseq_4	Y	84	H	TAT	84	1	CAT
4	B2_1i	1	12	B	4	imipenem	ACX60_RS06025	coding (944/1032 nt)	INS	:NA:	LysR family transcriptional regulator	1	small_indel	TTGC	1304822	NZ_CP012004	NA		breseq_4		NA			NA	NA
4	B2_1i	1	12	B	4	imipenem	ACX60_RS14630	1535	SNP	G:512:V	two-component sensor histidine kinase	0.226428	snp_nonsynonymous	A	3082577	NZ_CP012004	NA	nonsynonymous	breseq_4	V	512	G	GTG	512	2	GGG
4	B2_1i	1	12	B	4	imipenem	ACX60_RS14635	331	SNP	P:111:S	DNA-binding response regulator	0.653316	snp_nonsynonymous	A	3084530	NZ_CP012004	NA	nonsynonymous	breseq_4	S	111	P	TCA	111	1	CCA
3	B1_3i	3	12	B	4	imipenem	ACX60_RS01490	1517	SNP	T:506:I	peptide ABC transporter permease	1	snp_nonsynonymous	T	311213	NZ_CP012004	NA	nonsynonymous	breseq_3	I	506	T	ATT	506	2	ACT
3	B1_3i	3	12	B	4	imipenem	ACX60_RS02305	1309	SNP	I:437:V	hypothetical protein	0.143036	snp_nonsynonymous	C	472232	NZ_CP012004	NA	nonsynonymous	breseq_3	V	437	I	GTT	437	1	ATT
3	B1_3i	3	12	B	4	imipenem	ACX60_RS02390	coding (242/663 nt)	DEL	:NA:	hypothetical protein	0.662129	small_indel		489506	NZ_CP012004	1		breseq_3		NA			NA	NA
3	B1_3i	3	12	B	4	imipenem	ACX60_RS02390	247	SNP	C:83:R	hypothetical protein	0.33447	snp_nonsynonymous	C	489511	NZ_CP012004	NA	nonsynonymous	breseq_3	R	83	C	CGT	83	1	TGT
3	B1_3i	3	12	B	4	imipenem	ACX60_RS03765/ACX60_RS03770	intergenic (-112/+41)	SNP	:NA:	hypothetical protein/ammonium transporter	0.0649285	snp_intergenic	C	780501	NZ_CP012004	NA	intergenic	breseq_3		NA			NA	NA
3	B1_3i	3	12	B	4	imipenem	ACX60_RS05355	coding (82/963 nt)	DEL	:NA:	protease SohB	1	small_indel		1142085	NZ_CP012004	1		breseq_3		NA			NA	NA
3	B1_3i	3	12	B	4	imipenem	ACX60_RS06025	101	SNP	T:34:I	LysR family transcriptional regulator	0.0590377	snp_nonsynonymous	T	1303979	NZ_CP012004	NA	nonsynonymous	breseq_3	I	34	T	ATT	34	2	ACT
3	B1_3i	3	12	B	4	imipenem	ACX60_RS06025	165	SNP	K:55:N	LysR family transcriptional regulator	0.103851	snp_nonsynonymous	T	1304043	NZ_CP012004	NA	nonsynonymous	breseq_3	N	55	K	AAT	55	3	AAA
3	B1_3i	3	12	B	4	imipenem	ACX60_RS06025	coding (251-262/1032 nt)	DEL	:NA:	LysR family transcriptional regulator	1	small_indel		1304129	NZ_CP012004	12		breseq_3		NA			NA	NA
3	B1_3i	3	12	B	4	imipenem	ACX60_RS06025	877	SNP	E:293:*	LysR family transcriptional regulator	0.0984993	snp_nonsense	T	1304755	NZ_CP012004	NA	nonsense	breseq_3	*	293	E	TAA	293	1	GAA
3	B1_3i	3	12	B	4	imipenem	ACX60_RS07895	530	SNP	G:177:V	TetR family transcriptional regulator	1	snp_nonsynonymous	A	1678417	NZ_CP012004	NA	nonsynonymous	breseq_3	V	177	G	GTA	177	2	GGA
2	B1_2i	2	12	B	4	imipenem	ACX60_RS01490	1517	SNP	T:506:I	peptide ABC transporter permease	1	snp_nonsynonymous	T	311213	NZ_CP012004	NA	nonsynonymous	breseq_2	I	506	T	ATT	506	2	ACT
2	B1_2i	2	12	B	4	imipenem	ACX60_RS01490	1733	SNP	A:578:V	peptide ABC transporter permease	0.663873	snp_nonsynonymous	T	311429	NZ_CP012004	NA	nonsynonymous	breseq_2	V	578	A	GTC	578	2	GCC
2	B1_2i	2	12	B	4	imipenem	ACX60_RS01490	1771	SNP	R:591:C	peptide ABC transporter permease	0.0835404	snp_nonsynonymous	T	311467	NZ_CP012004	NA	nonsynonymous	breseq_2	C	591	R	TGC	591	1	CGC
2	B1_2i	2	12	B	4	imipenem	ACX60_RS02390	coding (462/663 nt)	DEL	:NA:	hypothetical protein	0.149021	small_indel		489726	NZ_CP012004	1		breseq_2		NA			NA	NA
2	B1_2i	2	12	B	4	imipenem	ACX60_RS02390	529	SNP	C:177:G	hypothetical protein	0.821142	snp_nonsynonymous	G	489793	NZ_CP012004	NA	nonsynonymous	breseq_2	G	177	C	GGT	177	1	TGT
2	B1_2i	2	12	B	4	imipenem	ACX60_RS03765/ACX60_RS03770	intergenic (-97/+56)	SNP	:NA:	hypothetical protein/ammonium transporter	0.0721292	snp_intergenic	A	780486	NZ_CP012004	NA	intergenic	breseq_2		NA			NA	NA
2	B1_2i	2	12	B	4	imipenem	ACX60_RS05355	coding (82/963 nt)	DEL	:NA:	protease SohB	1	small_indel		1142085	NZ_CP012004	1		breseq_2		NA			NA	NA
2	B1_2i	2	12	B	4	imipenem	ACX60_RS06020	coding (1021/1218 nt)	DEL	:NA:	MexE family multidrug efflux RND transporter periplasmic adaptor subunit	0.0813298	small_indel		1302661	NZ_CP012004	1		breseq_2		NA			NA	NA
2	B1_2i	2	12	B	4	imipenem	ACX60_RS06025	coding (251-262/1032 nt)	DEL	:NA:	LysR family transcriptional regulator	1	small_indel		1304129	NZ_CP012004	12		breseq_2		NA			NA	NA
2	B1_2i	2	12	B	4	imipenem	ACX60_RS07895	530	SNP	G:177:V	TetR family transcriptional regulator	1	snp_nonsynonymous	A	1678417	NZ_CP012004	NA	nonsynonymous	breseq_2	V	177	G	GTA	177	2	GGA
2	B1_2i	2	12	B	4	imipenem	ACX60_RS13470	1554	SNP	R:518:R	TonB-dependent siderophore receptor	0.052309	snp_synonymous	C	2834829	NZ_CP012004	NA	synonymous	breseq_2	R	518	R	CGG	518	3	CGT
1	B1_1i	1	12	B	4	imipenem	ACX60_RS01490	1736	SNP	A:579:V	peptide ABC transporter permease	1	snp_nonsynonymous	T	311432	NZ_CP012004	NA	nonsynonymous	breseq_1	V	579	A	GTT	579	2	GCT
1	B1_1i	1	12	B	4	imipenem	ACX60_RS02305	1309	SNP	I:437:V	hypothetical protein	0.0880437	snp_nonsynonymous	C	472232	NZ_CP012004	NA	nonsynonymous	breseq_1	V	437	I	GTT	437	1	ATT
1	B1_1i	1	12	B	4	imipenem	ACX60_RS05355	coding (82/963 nt)	DEL	:NA:	protease SohB	1	small_indel		1142085	NZ_CP012004	1		breseq_1		NA			NA	NA
1	B1_1i	1	12	B	4	imipenem	ACX60_RS05560	coding (35/516 nt)	INS	:NA:	hypothetical protein	1	small_indel	ATATTTT	1190843	NZ_CP012004	NA		breseq_1		NA			NA	NA
1	B1_1i	1	12	B	4	imipenem	ACX60_RS06025	coding (251-262/1032 nt)	DEL	:NA:	LysR family transcriptional regulator	1	small_indel		1304129	NZ_CP012004	12		breseq_1		NA			NA	NA
1	B1_1i	1	12	B	4	imipenem	ACX60_RS07895	530	SNP	G:177:V	TetR family transcriptional regulator	1	snp_nonsynonymous	A	1678417	NZ_CP012004	NA	nonsynonymous	breseq_1	V	177	G	GTA	177	2	GGA
1	B1_1i	1	12	B	4	imipenem	ACX60_RS09760	pseudogene (1739/1866 nt)	SNP	:NA:	peptidylprolyl isomerase	1	snp_pseudogene	C	2067464	NZ_CP012004	NA	pseudogene	breseq_1		NA			NA	NA
1	B1_1i	1	12	B	4	imipenem	ACX60_RS14465	156	SNP	T:52:T	hypothetical protein	0.131938	snp_synonymous	T	3048961	NZ_CP012004	NA	synonymous	breseq_1	T	52	T	ACA	52	3	ACC

## Sheet: Legend
Figure 4-source data 2. Complete list of mutated genes from the sequenced populations and clones. Complete list of mutated genes obtained and analyzed obtained as explained in methods.
