# Supplementary figures and images for: The roles of history, chance, and natural selection in the evolution of antibiotic resistance
Source: eLife journal article supplement (doi:10.7554/elife.70676), 2021-08-25

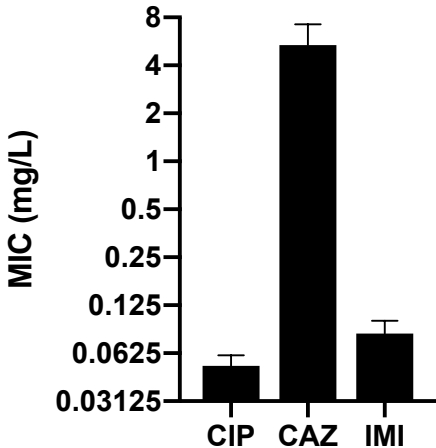

Supplement: supp [file elife_poa_e70676_Figure_1_figure_supplement_1.pdf › elife_poa_e70676_Figure_1_figure_supplement_1.pdf]

## Selection phase in Cefazidime

---

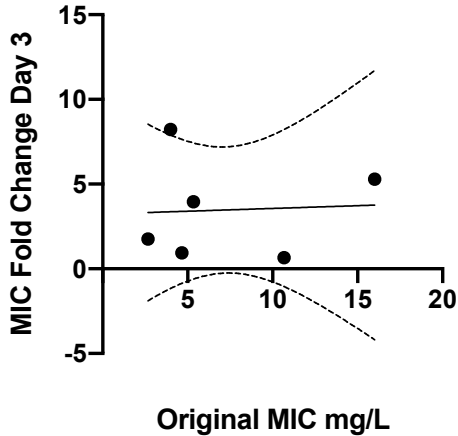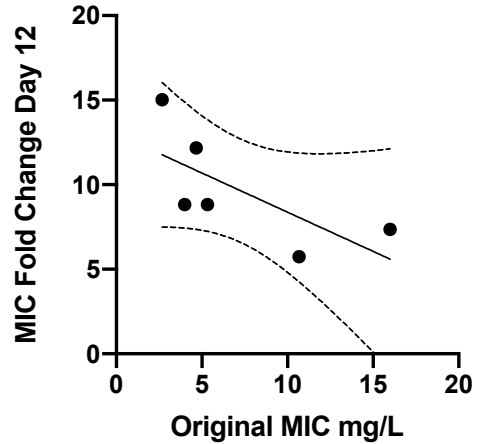

## Selection phase in Imipenem

---

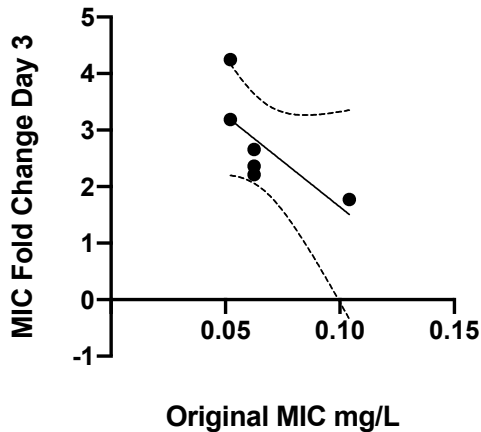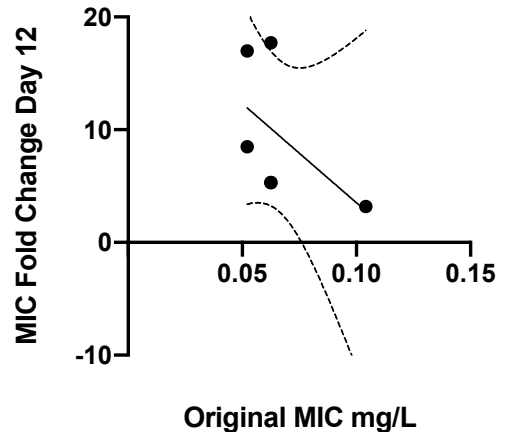

Supplement: supp [file elife_poa_e70676_Figure_2_figure_supplement_1.pdf › elife_poa_e70676_Figure_2_figure_supplement_1.pdf]
